# Supplementary material for: Carbapenem-ResistantKlebsiella pneumoniaeInfections among ICU Admission Patients in Central China: Prevalence and Prediction Model
Source: Hindawi journal article supplement (doi:10.1155/2019/9767313), 2019-03-27
Supplement: f1 [file 9767313.f1.pdf]

## Supplementary Materials

The supplementary materials about this research article included four parts as follows: 1) Sample distribution of CRKP and CSKP; 2) Antimicrobial susceptibility patterns of CRKP and CSKP strains to various antimicrobials; 3) Prevalence of antimicrobial resistance gene in all the 244 carbapenem resistant *Klebsiella pneumoniae* strains in terms of ST types; 4) Antibiotics prescription within 30 days before the patients infected by *Klebsiella pneumoniae* and 5) The data of sequence type and antimicrobial susceptibility testing.

### Table and figure legend

**Table S1 Sample distribution of CRKP and CSKP, n (%)**

| Specimen type   | Total<br>n=507 | CRKP<br>n=244 | CSKP<br>n=263 | P value |
|-----------------|----------------|---------------|---------------|---------|
| Sputum          | 151 (29.8)     | 75 (30.9)     | 76 (28.8)     | 0.651   |
| ETA             | 77 (15.2)      | 38 (15.6)     | 39 (14.9)     | 0.815   |
| BALF            | 83 (16.4)      | 40 (16.4)     | 43 (16.5)     | 0.989   |
| Urine           | 18 (3.6)       | 10 (4.3)      | 8 (2.9)       | 0.521   |
| Blood           | 108 (21.3)     | 52 (20.9)     | 56 (21.5)     | 0.996   |
| Pus             | 20 (3.9)       | 10 (4.1)      | 10 (3.8)      | 0.864   |
| Wound secretion | 50 (9.8)       | 19 (7.8)      | 31 (11.6)     | 0.131   |

ETA, Endotracheal aspirate; BALF, Bronchoalveolar Lavage Fluid; CRKP, Carbapenem-resistant *Klebsiella pneumoniae*; CSKP, Carbapenem susceptible *Klebsiella pneumoniae*;

**Table S2 Antimicrobial susceptibility patterns of CRKP and CSKP strains to various antimicrobials, n (%)**

| Antibiotics                   | Total<br>n=507 | CRKP<br>n=244 | CSKP<br>n=263 |
|-------------------------------|----------------|---------------|---------------|
| Piperacillin                  | 147 (28.9)     | 0 (0)         | 147 (55.9)    |
| Ampicillin-sulbactam          | 147 (28.9)     | 0 (0)         | 147 (55.9)    |
| Piperacillin-tazobactam       | 228 (44.9)     | 0 (0)         | 228 (86.7)    |
| cCiprofloxacin                | 206 (40.6)     | 7 (2.9)       | 199 (75.7)    |
| Levofloxacin                  | 215 (42.4)     | 9 (3.7)       | 206 (78.3)    |
| Cefuroxime                    | 173 (34.1)     | 1 (0.4)       | 172 (65.4)    |
| Ceftazidime                   | 207 (40.8)     | 3 (1.2)       | 204 (77.6)    |
| Cefepime                      | 195 (38.5)     | 4 (1.6)       | 191 (72.6)    |
| Aztreonam                     | 187 (36.9)     | 0 (0)         | 187 (71.1)    |
| Amikacin                      | 326 (64.3)     | 76 (31.1)     | 250 (95.1)    |
| Gentamicin                    | 218 (42.9)     | 28 (11.5)     | 190 (72.2)    |
| Fosfomycin                    | 281 (55.4)     | 86 (35.2)     | 195 (74.1)    |
| Tigecycline                   | 488 (96.3)     | 233 (95.5)    | 255 (96.9)    |
| Trimethoprim-sulfamethoxazole | 200 (39.4)     | 0 (0)         | 200 (76.0)    |
| Ertapenem                     | 263 (51.9)     | 0 (0)         | 263 (100)     |
| Meropenem                     | 267 (52.7)     | 4 (1.6)       | 263 (100)     |

Imipenem 263 (51.9) 0 (0) 263 (100)

CRKP, Carbapenem-resistant *Klebsiella pneumoniae*; CSKP, Carbapenem susceptible *Klebsiella pneumoniae*;

**Table S3 Prevalence of antimicrobial resistance gene in all the 244 carbapenem resistant *Klebsiella pneumoniae* strains in terms of ST types, n(%)**

| STs          | Antibiotic resistance gene |               |               |               |               |
|--------------|----------------------------|---------------|---------------|---------------|---------------|
|              | <i>blaKPC-2</i>            | <i>blaNDM</i> | <i>blaIMP</i> | <i>blaOXA</i> | <i>blaVIM</i> |
| ST11 (n=206) | 199 (96.6)                 | 0             | 0             | 0             | 0             |
| ST15 (n=12)  | 6 (50)                     | 2 (16.7)      | 1 (8.3)       | 0             | 0             |
| ST323 (n=11) | 6 (54.5)                   | 2 (18.2)      | 0             | 0             | 0             |
| ST1869 (n=6) | 2 (33.3)                   | 0             | 1 (16.7)      | 0             | 0             |
| ST722 (n=4)  | 0                          | 2 (50)        | 1 (25)        | 0             | 0             |
| ST1647 (n=2) | 0                          | 0             | 1 (50)        | 0             | 0             |
| ST709 (n=2)  | 1 (50)                     | 0             | 0             | 0             | 0             |
| ST45 (n=1)   | 0                          | 0             | 0             | 0             | 0             |

ST, sequence type

**Table S4 Antibiotics prescription within 30 days before the patients infected by *Klebsiella pneumoniae***

| Prior antibiotics treatment (n, %)             | CRKP      | CSKP      | P value |
|------------------------------------------------|-----------|-----------|---------|
|                                                | n=244     | n=263     |         |
| Aminoglycosides                                | 47 (19.3) | 26 (9.9)  | 0.004   |
| Carbapenems                                    | 53 (21.7) | 12 (4.6)  | <0.001  |
| Co-trimoxazoles                                | 7 (2.9)   | 5 (1.9)   | 0.672   |
| Penicillin groups                              | 12 (4.9)  | 9 (3.4)   | 0.398   |
| Quinolones                                     | 23 (9.4)  | 11 (4.2)  | 0.018   |
| Macrolides                                     | 3 (1.2)   | 5 (1.9)   | 0.803   |
| Tetracyclines                                  | 3 (1.2)   | 7 (2.7)   | 0.401   |
| Nitroimidazoles                                | 5 (2.0)   | 5 (1.9)   | 0.842   |
| Fosfomycins                                    | 7 (2.9)   | 9 (3.4)   | 0.722   |
| Glycopeptides                                  | 11 (4.5)  | 8 (3.0)   | 0.385   |
| First-generation cephalosporins                | 17 (6.9)  | 9 (3.4)   | 0.07    |
| Second-generation cephalosporins               | 10 (4.1)  | 12 (4.6)  | 0.798   |
| Third-generation cephalosporins                | 21 (8.6)  | 8 (3.0)   | 0.012   |
| Fourth-generation cephalosporins               | 27 (11.1) | 11 (4.2)  | 0.003   |
| $\beta$ -Lactam/ $\beta$ -lactamase inhibitors | 43 (17.6) | 47 (17.9) | 0.942   |

CRKP, Carbapenem-resistant *Klebsiella pneumoniae*; CSKP, Carbapenem susceptible *Klebsiella pneumoniae*;

Table 1

| Number | Patients ID | Gender | Department | Sample ID  | Sample distribution | Bacteria | ST type |
|--------|-------------|--------|------------|------------|---------------------|----------|---------|
| 1      | 1211008     | m      | icu        | 1712211089 | sputum              | kpn      | ST11    |
| 2      | 1255707     | m      | icu        | 170307010  | sputum              | kpn      | ST11    |
| 3      | 1387145     | f      | icu        | 170701698  | sputum              | kpn      | ST11    |
| 4      | 1435940     | m      | icu        | 170423020  | sputum              | kpn      | ST11    |
| 5      | 1457348     | f      | icu        | 170507016  | sputum              | kpn      | ST11    |
| 6      | 1467859     | m      | icu        | 1711214038 | sputum              | kpn      | ST1869  |
| 7      | 1603858     | f      | icu        | 170512076  | sputum              | kpn      | ST11    |
| 8      | 1628916     | m      | icu        | 1709026113 | sputum              | kpn      | ST11    |
| 9      | 1631286     | f      | icu        | 1711234030 | sputum              | kpn      | ST15    |
| 10     | 1643835     | f      | icu        | 170408661  | sputum              | kpn      | ST11    |
| 11     | 1654306     | m      | icu        | 1709146103 | sputum              | kpn      | ST11    |
| 12     | 1655141     | f      | icu        | 170226009  | sputum              | kpn      | ST11    |
| 13     | 1673544     | f      | icu        | 170104515  | sputum              | kpn      | ST11    |
| 14     | 1674016     | m      | icu        | 170103010  | sputum              | kpn      | ST11    |
| 15     | 1676693     | f      | icu        | 170517321  | sputum              | kpn      | ST11    |
| 16     | 1676967     | f      | icu        | 170316684  | sputum              | kpn      | ST11    |
| 17     | 1677363     | f      | icu        | 170102017  | sputum              | kpn      | ST323   |
| 18     | 1677521     | f      | icu        | 170112010  | sputum              | kpn      | ST11    |
| 19     | 1678002     | m      | icu        | 170122053  | sputum              | kpn      | ST11    |
| 20     | 1678087     | f      | icu        | 170905G011 | sputum              | kpn      | ST15    |
| 21     | 1678329     | f      | icu        | 170101705  | sputum              | kpn      | ST11    |
| 22     | 1679510     | f      | icu        | 170108647  | sputum              | kpn      | ST11    |
| 23     | 1681169     | m      | icu        | 170201014  | sputum              | kpn      | ST722   |
| 24     | 1681287     | f      | icu        | 170112076  | sputum              | kpn      | ST11    |
| 25     | 1681407     | m      | icu        | 170224699  | sputum              | kpn      | ST11    |
| 26     | 1681610     | f      | icu        | 170111060  | sputum              | kpn      | ST1869  |
| 27     | 1683217     | m      | icu        | 170117042  | sputum              | kpn      | ST11    |
| 28     | 1683428     | f      | icu        | 170118514  | sputum              | kpn      | ST11    |
| 29     | 1683853     | f      | icu        | 170112030  | sputum              | kpn      | ST11    |
| 30     | 1683893     | m      | icu        | 1711051011 | sputum              | kpn      | ST11    |
| 31     | 1684044     | f      | icu        | 170225056  | sputum              | kpn      | ST11    |
| 32     | 1684190     | m      | icu        | 170418324  | sputum              | kpn      | ST11    |
| 33     | 1684510     | f      | icu        | 170125061  | sputum              | kpn      | ST11    |
| 34     | 1684821     | m      | icu        | 170128039  | sputum              | kpn      | ST15    |
| 35     | 1685440     | f      | icu        | 170125514  | sputum              | kpn      | ST11    |
| 36     | 1687366     | f      | icu        | 170201055  | sputum              | kpn      | ST11    |
| 37     | 1688971     | f      | icu        | 170305308  | sputum              | kpn      | ST11    |
| 38     | 1689120     | m      | icu        | 170203046  | sputum              | kpn      | ST11    |
| 39     | 1689894     | f      | icu        | 170330084  | sputum              | kpn      | ST11    |
| 40     | 1690370     | f      | icu        | 170202637  | sputum              | kpn      | ST709   |
| 41     | 1691389     | m      | icu        | 170204011  | sputum              | kpn      | ST11    |
| 42     | 1692011     | f      | icu        | 170208039  | sputum              | kpn      | ST11    |
| 43     | 1695674     | m      | icu        | 170210067  | sputum              | kpn      | ST11    |
| 44     | 1696129     | f      | icu        | 170212012  | sputum              | kpn      | ST11    |
| 45     | 1696670     | m      | icu        | 170405022  | sputum              | kpn      | ST11    |
| 46     | 1698113     | f      | icu        | 170325017  | sputum              | kpn      | ST11    |
| 47     | 1700328     | m      | icu        | 170319512  | sputum              | kpn      | ST11    |
| 48     | 1700934     | f      | icu        | 170222047  | sputum              | kpn      | ST11    |
| 49     | 1702475     | m      | icu        | 170306014  | sputum              | kpn      | ST15    |
| 50     | 1703413     | f      | icu        | 170304029  | sputum              | kpn      | ST11    |
| 51     | 1704192     | m      | icu        | 170620637  | sputum              | kpn      | ST11    |
| 52     | 1706017     | m      | icu        | 170318057  | sputum              | kpn      | ST11    |

|     |         |   |     |            |        |     |       |
|-----|---------|---|-----|------------|--------|-----|-------|
| 53  | 1707501 | f | icu | 170308002  | sputum | kpn | ST11  |
| 54  | 1707627 | f | icu | 170306704  | sputum | kpn | ST11  |
| 55  | 1710844 | m | icu | 170423668  | sputum | kpn | ST11  |
| 56  | 1711345 | f | icu | 170327045  | sputum | kpn | ST11  |
| 57  | 1711559 | m | icu | 1711186131 | sputum | kpn | ST11  |
| 58  | 1711905 | m | icu | 170313026  | sputum | kpn | ST11  |
| 59  | 1712856 | f | icu | 170318058  | sputum | kpn | ST15  |
| 60  | 1713261 | m | icu | 170314669  | sputum | kpn | ST11  |
| 61  | 1713952 | m | icu | 170331075  | sputum | kpn | ST11  |
| 62  | 1714960 | f | icu | 170425007  | sputum | kpn | ST11  |
| 63  | 1715473 | m | icu | 170402520  | sputum | kpn | ST11  |
| 64  | 1716196 | f | icu | 170331520  | sputum | kpn | ST11  |
| 65  | 1717117 | m | icu | 170327009  | sputum | kpn | ST11  |
| 66  | 1717330 | f | icu | 170328516  | sputum | kpn | ST11  |
| 67  | 1718209 | m | icu | 170325303  | sputum | kpn | ST11  |
| 68  | 1718292 | f | icu | 170401207  | sputum | kpn | ST15  |
| 69  | 1718861 | f | icu | 170329537  | sputum | kpn | ST11  |
| 70  | 1719002 | f | icu | 170409512  | sputum | kpn | ST11  |
| 71  | 1719585 | f | icu | 170401011  | sputum | kpn | ST11  |
| 72  | 1720545 | m | icu | 170411001  | sputum | kpn | ST11  |
| 73  | 1722263 | m | icu | 170409012  | sputum | kpn | ST15  |
| 74  | 1722520 | m | icu | 1711271077 | sputum | kpn | ST11  |
| 75  | 1722588 | f | icu | 170513605  | sputum | kpn | ST11  |
| 76  | 1722653 | m | icu | 170420512  | ETA    | kpn | ST11  |
| 77  | 1722820 | f | icu | 170402714  | ETA    | kpn | ST11  |
| 78  | 1723040 | f | icu | 170601046  | ETA    | kpn | ST11  |
| 79  | 1724993 | m | icu | 170408030  | ETA    | kpn | ST11  |
| 80  | 1725517 | m | icu | 170419004  | ETA    | kpn | ST11  |
| 81  | 1725783 | f | icu | 1711261073 | ETA    | kpn | ST11  |
| 82  | 1727646 | m | icu | 170417522  | ETA    | kpn | ST15  |
| 83  | 1728409 | m | icu | 1709161073 | ETA    | kpn | ST11  |
| 84  | 1728979 | f | icu | 170417049  | ETA    | kpn | ST11  |
| 85  | 1729216 | f | icu | 170423018  | ETA    | kpn | ST11  |
| 86  | 1729494 | m | icu | 170416679  | ETA    | kpn | ST722 |
| 87  | 1732456 | f | icu | 170427005  | ETA    | kpn | ST11  |
| 88  | 1732972 | m | icu | 170428036  | ETA    | kpn | ST11  |
| 89  | 1733175 | f | icu | 170603518  | ETA    | kpn | ST11  |
| 90  | 1733558 | m | icu | 170501015  | ETA    | kpn | ST11  |
| 91  | 1735030 | f | icu | 170620007  | ETA    | kpn | ST11  |
| 92  | 1736316 | m | icu | 170517054  | ETA    | kpn | ST11  |
| 93  | 1736478 | f | icu | 170520665  | ETA    | kpn | ST323 |
| 94  | 1736545 | f | icu | 170503060  | ETA    | kpn | ST11  |
| 95  | 1736849 | m | icu | 170518070  | ETA    | kpn | ST11  |
| 96  | 1737908 | f | icu | 170525054  | ETA    | kpn | ST709 |
| 97  | 1738572 | m | icu | 170520020  | ETA    | kpn | ST11  |
| 98  | 1738637 | f | icu | 170511057  | ETA    | kpn | ST11  |
| 99  | 1739659 | f | icu | 170506514  | ETA    | kpn | ST11  |
| 100 | 1739709 | m | icu | 170511052  | ETA    | kpn | ST11  |
| 101 | 1740093 | f | icu | 170525062  | ETA    | kpn | ST11  |
| 102 | 1740266 | m | icu | 170511067  | ETA    | kpn | ST323 |
| 103 | 1741070 | f | icu | 170514017  | ETA    | kpn | ST11  |
| 104 | 1746779 | m | icu | 170529630  | ETA    | kpn | ST11  |
| 105 | 1748811 | f | icu | 170607072  | ETA    | kpn | ST15  |
| 106 | 1749608 | m | icu | 170525708  | ETA    | kpn | ST11  |

|     |         |   |     |            |       |     |        |
|-----|---------|---|-----|------------|-------|-----|--------|
| 107 | 1749979 | f | icu | 170528001  | ETA   | kpn | ST11   |
| 108 | 1750181 | f | icu | 170603055  | ETA   | kpn | ST11   |
| 109 | 1750600 | f | icu | 170601010  | ETA   | kpn | ST11   |
| 110 | 1750762 | f | icu | 170619037  | ETA   | kpn | ST11   |
| 111 | 1751643 | m | icu | 170605021  | ETA   | kpn | ST11   |
| 112 | 1752526 | m | icu | 170615061  | ETA   | kpn | ST11   |
| 113 | 1753504 | m | icu | 170706022  | ETA   | kpn | ST323  |
| 114 | 1753816 | m | icu | 170624060  | ETA   | kpn | ST11   |
| 115 | 1755284 | f | icu | 170626038  | BALF  | kpn | ST11   |
| 116 | 1755340 | f | icu | 170703060  | BALF  | kpn | ST11   |
| 117 | 1756051 | m | icu | 170610062  | BALF  | kpn | ST11   |
| 118 | 1756142 | f | icu | 170611623  | BALF  | kpn | ST1869 |
| 119 | 1757201 | m | icu | 170622070  | BALF  | kpn | ST11   |
| 120 | 1757736 | m | icu | 170614528  | BALF  | kpn | ST11   |
| 121 | 1758330 | f | icu | 170615033  | BALF  | kpn | ST11   |
| 122 | 1758395 | m | icu | 170625620  | BALF  | kpn | ST11   |
| 123 | 1758448 | m | icu | 170707206  | BALF  | kpn | ST722  |
| 124 | 1759555 | m | icu | 170719677  | BALF  | kpn | ST11   |
| 125 | 1759817 | m | icu | 170705612  | BALF  | kpn | ST11   |
| 126 | 1760643 | f | icu | 170620731  | BALF  | kpn | ST11   |
| 127 | 1761292 | f | icu | 170701512  | BALF  | kpn | ST11   |
| 128 | 1761352 | m | icu | 170705058  | BALF  | kpn | ST11   |
| 129 | 1762617 | m | icu | 170701062  | BALF  | kpn | ST11   |
| 130 | 1762843 | m | icu | 170701061  | BALF  | kpn | ST11   |
| 131 | 1763053 | m | icu | 1708081001 | BALF  | kpn | ST323  |
| 132 | 1763080 | m | icu | 170701042  | BALF  | kpn | ST11   |
| 133 | 1765040 | m | icu | 170715061  | BALF  | kpn | ST1647 |
| 134 | 1765508 | m | icu | 170701053  | BALF  | kpn | ST11   |
| 135 | 1765923 | m | icu | 170706076  | BALF  | kpn | ST11   |
| 136 | 1766094 | m | icu | 170719028  | BALF  | kpn | ST11   |
| 137 | 1766123 | m | icu | 170704068  | BALF  | kpn | ST11   |
| 138 | 1766176 | m | icu | 170707039  | BALF  | kpn | ST323  |
| 139 | 1766198 | f | icu | 170801050  | BALF  | kpn | ST11   |
| 140 | 1766489 | m | icu | 170706077  | BALF  | kpn | ST11   |
| 141 | 1767244 | m | icu | 170705062  | BALF  | kpn | ST11   |
| 142 | 1767348 | f | icu | 170722031  | BALF  | kpn | ST11   |
| 143 | 1768100 | f | icu | 170705001  | BALF  | kpn | ST11   |
| 144 | 1769562 | m | icu | 170711078  | BALF  | kpn | ST45   |
| 145 | 1769847 | f | icu | 170709027  | BALF  | kpn | ST11   |
| 146 | 1770111 | f | icu | 170723203  | BALF  | kpn | ST11   |
| 147 | 1770177 | m | icu | 170710740  | BALF  | kpn | ST11   |
| 148 | 1770730 | f | icu | 170712065  | BALF  | kpn | ST11   |
| 149 | 1771549 | f | icu | 170731043  | BALF  | kpn | ST11   |
| 150 | 1772176 | m | icu | 1708104017 | BALF  | kpn | ST323  |
| 151 | 1772963 | f | icu | 170724501  | BALF  | kpn | ST11   |
| 152 | 1773213 | m | icu | 170714730  | BALF  | kpn | ST11   |
| 153 | 1773735 | f | icu | 170719055  | BALF  | kpn | ST11   |
| 154 | 1774722 | m | icu | 170725025  | BALF  | kpn | ST11   |
| 155 | 1775047 | m | icu | 170722030  | BALF  | kpn | ST11   |
| 156 | 1775557 | f | icu | 170807H029 | Urine | kpn | ST11   |
| 157 | 1775768 | f | icu | 1708054030 | Urine | kpn | ST11   |
| 158 | 1776183 | m | icu | 1708091004 | Urine | kpn | ST11   |
| 159 | 1776245 | f | icu | 170721202  | Urine | kpn | ST11   |
| 160 | 1776929 | f | icu | 170801048  | Urine | kpn | ST11   |

|     |         |   |     |            |       |     |        |
|-----|---------|---|-----|------------|-------|-----|--------|
| 161 | 1777669 | m | icu | 1708101033 | Urine | kpn | ST11   |
| 162 | 1778511 | f | icu | 170728024  | Urine | kpn | ST11   |
| 163 | 1779476 | f | icu | 170730001  | Urine | kpn | ST11   |
| 164 | 1779744 | f | icu | 170809H060 | Urine | kpn | ST11   |
| 165 | 1780136 | m | icu | 1710014002 | Urine | kpn | ST11   |
| 166 | 1780855 | m | icu | 1708056115 | Blood | kpn | ST11   |
| 167 | 1781129 | f | icu | 1708211061 | Blood | kpn | ST11   |
| 168 | 1782896 | f | icu | 1708301068 | Blood | kpn | ST11   |
| 169 | 1783150 | m | icu | 1709271073 | Blood | kpn | ST11   |
| 170 | 1785644 | f | icu | 1708121081 | Blood | kpn | ST11   |
| 171 | 1786611 | m | icu | 1710181069 | Blood | kpn | ST11   |
| 172 | 1786730 | m | icu | 1708131056 | Blood | kpn | ST11   |
| 173 | 1787863 | f | icu | 1708201002 | Blood | kpn | ST11   |
| 174 | 1788964 | m | icu | 1708261063 | Blood | kpn | ST11   |
| 175 | 1789110 | f | icu | 1708174036 | Blood | kpn | ST11   |
| 176 | 1789592 | f | icu | 1708254024 | Blood | kpn | ST11   |
| 177 | 1789827 | m | icu | 1709251094 | Blood | kpn | ST11   |
| 178 | 1789833 | m | icu | 1709281075 | Blood | kpn | ST11   |
| 179 | 1790155 | f | icu | 1708196105 | Blood | kpn | ST15   |
| 180 | 1793330 | f | icu | 1708291053 | Blood | kpn | ST11   |
| 181 | 1795261 | f | icu | 1709036112 | Blood | kpn | ST11   |
| 182 | 1796385 | m | icu | 170917G002 | Blood | kpn | ST11   |
| 183 | 1796449 | m | icu | 1709171010 | Blood | kpn | ST11   |
| 184 | 1798073 | f | icu | 171021G005 | Blood | kpn | ST11   |
| 185 | 1798991 | f | icu | 1710041049 | Blood | kpn | ST11   |
| 186 | 1800441 | m | icu | 1712261008 | Blood | kpn | ST11   |
| 187 | 1800637 | m | icu | 1709171026 | Blood | kpn | ST11   |
| 188 | 1802164 | m | icu | 1711091112 | Blood | kpn | ST11   |
| 189 | 1802353 | m | icu | 1709251035 | Blood | kpn | ST11   |
| 190 | 1803598 | f | icu | 1709301089 | Blood | kpn | ST11   |
| 191 | 1807531 | m | icu | 1710091076 | Blood | kpn | ST722  |
| 192 | 1809155 | m | icu | 1710191059 | Blood | kpn | ST11   |
| 193 | 1809300 | m | icu | 1710071068 | Blood | kpn | ST11   |
| 194 | 1809481 | m | icu | 1711246082 | Blood | kpn | ST11   |
| 195 | 1811703 | m | icu | 1711164026 | Blood | kpn | ST11   |
| 196 | 1812416 | m | icu | 1710116074 | Blood | kpn | ST11   |
| 197 | 1812894 | f | icu | 1710216107 | Blood | kpn | ST11   |
| 198 | 1813076 | m | icu | 1710134037 | Blood | kpn | ST11   |
| 199 | 1815884 | m | icu | 1710181078 | Blood | kpn | ST11   |
| 200 | 1816127 | m | icu | 1712046024 | Blood | kpn | ST11   |
| 201 | 1817365 | m | icu | 171126G001 | Blood | kpn | ST11   |
| 202 | 1819146 | m | icu | 1711074011 | Blood | kpn | ST11   |
| 203 | 1819758 | f | icu | 1711181086 | Blood | kpn | ST11   |
| 204 | 1820477 | f | icu | 1711041088 | Blood | kpn | ST15   |
| 205 | 1821991 | f | icu | 1711183028 | Blood | kpn | ST11   |
| 206 | 1822057 | m | icu | 1711011009 | Blood | kpn | ST1647 |
| 207 | 1822430 | m | icu | 1711181015 | Blood | kpn | ST11   |
| 208 | 1822599 | m | icu | 1712151124 | Blood | kpn | ST11   |
| 209 | 1823146 | m | icu | 1711041017 | Blood | kpn | ST11   |
| 210 | 1824014 | m | icu | 1711164035 | Blood | kpn | ST11   |
| 211 | 1824858 | m | icu | 1711161088 | Blood | kpn | ST11   |
| 212 | 1825262 | m | icu | 1711271037 | Blood | kpn | ST11   |
| 213 | 1825889 | m | icu | 1711236129 | Blood | kpn | ST11   |
| 214 | 1826017 | f | icu | 1711091105 | Blood | kpn | ST11   |

|     |         |   |     |            |                 |     |        |
|-----|---------|---|-----|------------|-----------------|-----|--------|
| 215 | 1826067 | m | icu | 1711261061 | Blood           | kpn | ST323  |
| 216 | 1826174 | m | icu | 1711294015 | Blood           | kpn | ST11   |
| 217 | 1826332 | m | icu | 1711091097 | Pus             | kpn | ST11   |
| 218 | 1826389 | f | icu | 1712151016 | Pus             | kpn | ST11   |
| 219 | 1826466 | m | icu | 1712221093 | Pus             | kpn | ST11   |
| 220 | 1826503 | m | icu | 1711111081 | Pus             | kpn | ST11   |
| 221 | 1826507 | m | icu | 1712091004 | Pus             | kpn | ST11   |
| 222 | 1826858 | f | icu | 1711106071 | Pus             | kpn | ST11   |
| 223 | 1827255 | m | icu | 1711181020 | Pus             | kpn | ST323  |
| 224 | 1827473 | f | icu | 1711131026 | Pus             | kpn | ST11   |
| 225 | 1827500 | m | icu | 1711131024 | Pus             | kpn | ST11   |
| 226 | 1828232 | m | icu | 1711221010 | Pus             | kpn | ST11   |
| 227 | 1829427 | f | icu | 1712041001 | Wound secretion | kpn | ST323  |
| 228 | 1829496 | m | icu | 171127G009 | Wound secretion | kpn | ST11   |
| 229 | 1829525 | m | icu | 1711261083 | Wound secretion | kpn | ST1869 |
| 230 | 1830110 | f | icu | 1712011075 | Wound secretion | kpn | ST11   |
| 231 | 1831141 | f | icu | 1712111077 | Wound secretion | kpn | ST11   |
| 232 | 1832787 | m | icu | 1712171004 | Wound secretion | kpn | ST11   |
| 233 | 1833087 | f | icu | 1711251054 | Wound secretion | kpn | ST11   |
| 234 | 1833255 | f | icu | 1711274022 | Wound secretion | kpn | ST11   |
| 235 | 1833931 | m | icu | 1711264012 | Wound secretion | kpn | ST1869 |
| 236 | 1834695 | f | icu | 1712031031 | Wound secretion | kpn | ST11   |
| 237 | 1836111 | m | icu | 1712091078 | Wound secretion | kpn | ST11   |
| 238 | 1836927 | m | icu | 1712091011 | Wound secretion | kpn | ST323  |
| 239 | 1837981 | f | icu | 1712074046 | Wound secretion | kpn | ST11   |
| 240 | 1839209 | m | icu | 1712131013 | Wound secretion | kpn | ST15   |
| 241 | 1843688 | f | icu | 1712201007 | Wound secretion | kpn | ST11   |
| 242 | 1844885 | m | icu | 1712204018 | Wound secretion | kpn | ST11   |
| 243 | 1848366 | f | icu | 1712281005 | Wound secretion | kpn | ST11   |
| 244 | 1848507 | m | icu | 1712291085 | Wound secretion | kpn | ST1869 |

Table 2

| Number | Patients ID | Piperacillin | Ampicillin-sulbactam | Piperacillin-tazobactam | Ciprofloxacin | Levofloxacin | Cefuroxime |
|--------|-------------|--------------|----------------------|-------------------------|---------------|--------------|------------|
| 1      | 1211008     | >128         | ≥ 32/16              | ≥ 128/4                 | ≥ 1           | ≥ 2          | ≥ 32       |
| 2      | 1255707     | >128         | ≥ 32/16              | ≥ 128/4                 | ≥ 1           | ≥ 2          | ≥ 32       |
| 3      | 1387145     | >128         | ≥ 32/16              | ≥ 128/4                 | ≥ 1           | ≥ 2          | ≥ 32       |
| 4      | 1435940     | >128         | ≥ 32/16              | ≥ 128/4                 | ≥ 1           | ≥ 2          | ≥ 32       |
| 5      | 1457348     | >128         | ≥ 32/16              | ≥ 128/4                 | ≥ 1           | ≥ 2          | ≥ 32       |
| 6      | 1467859     | >128         | ≥ 32/16              | ≥ 128/4                 | ≥ 1           | ≥ 2          | ≥ 32       |
| 7      | 1603858     | >128         | ≥ 32/16              | ≥ 128/4                 | ≥ 1           | ≥ 2          | ≥ 32       |
| 8      | 1628916     | >128         | ≥ 32/16              | ≥ 128/4                 | ≥ 1           | ≥ 2          | ≥ 32       |
| 9      | 1631286     | >128         | ≥ 32/16              | ≥ 128/4                 | ≥ 1           | ≥ 2          | ≥ 32       |
| 10     | 1643835     | >128         | ≥ 32/16              | ≥ 128/4                 | ≥ 1           | ≥ 2          | ≥ 32       |
| 11     | 1654306     | >128         | ≥ 32/16              | ≥ 128/4                 | ≤ 0.05        | ≤ 0.12       | ≥ 32       |
| 12     | 1655141     | >128         | ≥ 32/16              | ≥ 128/4                 | ≥ 1           | ≥ 2          | ≥ 32       |
| 13     | 1673544     | >128         | ≥ 32/16              | ≥ 128/4                 | ≥ 1           | ≥ 2          | ≥ 32       |
| 14     | 1674016     | >128         | ≥ 32/16              | ≥ 128/4                 | ≥ 1           | ≥ 2          | ≥ 32       |
| 15     | 1676693     | >128         | ≥ 32/16              | ≥ 128/4                 | ≥ 1           | ≥ 2          | ≥ 32       |
| 16     | 1676967     | >128         | ≥ 32/16              | ≥ 128/4                 | ≥ 1           | ≥ 2          | ≥ 32       |
| 17     | 1677363     | >128         | ≥ 32/16              | ≥ 128/4                 | ≥ 1           | ≥ 2          | ≥ 32       |
| 18     | 1677521     | >128         | ≥ 32/16              | ≥ 128/4                 | ≥ 1           | ≥ 2          | ≥ 32       |
| 19     | 1678002     | >128         | ≥ 32/16              | ≥ 128/4                 | ≥ 1           | ≥ 2          | ≥ 32       |
| 20     | 1678087     | >128         | ≥ 32/16              | ≥ 128/4                 | ≥ 1           | ≥ 2          | ≤ 4        |
| 21     | 1678329     | >128         | ≥ 32/16              | ≥ 128/4                 | ≥ 1           | ≥ 2          | ≥ 32       |
| 22     | 1679510     | >128         | ≥ 32/16              | ≥ 128/4                 | ≥ 1           | ≥ 2          | ≥ 32       |
| 23     | 1681169     | >128         | ≥ 32/16              | ≥ 128/4                 | ≥ 1           | ≥ 2          | ≥ 32       |
| 24     | 1681287     | >128         | ≥ 32/16              | ≥ 128/4                 | ≥ 1           | ≥ 2          | ≥ 32       |
| 25     | 1681407     | >128         | ≥ 32/16              | ≥ 128/4                 | ≥ 1           | ≥ 2          | ≥ 32       |
| 26     | 1681610     | >128         | ≥ 32/16              | ≥ 128/4                 | ≥ 1           | ≥ 2          | ≥ 32       |
| 27     | 1683217     | >128         | ≥ 32/16              | ≥ 128/4                 | ≥ 1           | ≥ 2          | ≥ 32       |
| 28     | 1683428     | >128         | ≥ 32/16              | ≥ 128/4                 | ≥ 1           | ≥ 2          | ≥ 32       |
| 29     | 1683853     | >128         | ≥ 32/16              | ≥ 128/4                 | ≥ 1           | ≥ 2          | ≥ 32       |
| 30     | 1683893     | >128         | ≥ 32/16              | ≥ 128/4                 | ≥ 1           | ≥ 2          | ≥ 32       |
| 31     | 1684044     | >128         | ≥ 32/16              | ≥ 128/4                 | ≥ 1           | ≥ 2          | ≥ 32       |
| 32     | 1684190     | >128         | ≥ 32/16              | ≥ 128/4                 | ≤ 0.05        | ≤ 0.12       | ≥ 32       |
| 33     | 1684510     | >128         | ≥ 32/16              | ≥ 128/4                 | ≥ 1           | ≥ 2          | ≥ 32       |
| 34     | 1684821     | >128         | ≥ 32/16              | ≥ 128/4                 | ≥ 1           | ≥ 2          | ≥ 32       |
| 35     | 1685440     | >128         | ≥ 32/16              | ≥ 128/4                 | ≥ 1           | ≥ 2          | ≥ 32       |
| 36     | 1687366     | >128         | ≥ 32/16              | ≥ 128/4                 | ≥ 1           | ≥ 2          | ≥ 32       |
| 37     | 1688971     | >128         | ≥ 32/16              | ≥ 128/4                 | ≥ 1           | ≥ 2          | ≥ 32       |
| 38     | 1689120     | >128         | ≥ 32/16              | ≥ 128/4                 | ≥ 1           | ≥ 2          | ≥ 32       |
| 39     | 1689894     | >128         | ≥ 32/16              | ≥ 128/4                 | ≥ 1           | ≥ 2          | ≥ 32       |
| 40     | 1690370     | >128         | ≥ 32/16              | ≥ 128/4                 | ≥ 1           | ≥ 2          | ≥ 32       |
| 41     | 1691389     | >128         | ≥ 32/16              | ≥ 128/4                 | ≥ 1           | ≥ 2          | ≥ 32       |
| 42     | 1692011     | >128         | ≥ 32/16              | ≥ 128/4                 | ≥ 1           | ≥ 2          | ≥ 32       |
| 43     | 1695674     | >128         | ≥ 32/16              | ≥ 128/4                 | ≥ 1           | ≥ 2          | ≥ 32       |
| 44     | 1696129     | >128         | ≥ 32/16              | ≥ 128/4                 | ≥ 1           | ≥ 2          | ≥ 32       |
| 45     | 1696670     | >128         | ≥ 32/16              | ≥ 128/4                 | ≥ 1           | ≥ 2          | ≥ 32       |
| 46     | 1698113     | >128         | ≥ 32/16              | ≥ 128/4                 | ≥ 1           | ≥ 2          | ≥ 32       |
| 47     | 1700328     | >128         | ≥ 32/16              | ≥ 128/4                 | ≥ 1           | ≥ 2          | ≥ 32       |
| 48     | 1700934     | >128         | ≥ 32/16              | ≥ 128/4                 | ≥ 1           | ≥ 2          | ≥ 32       |
| 49     | 1702475     | >128         | ≥ 32/16              | ≥ 128/4                 | ≥ 1           | ≥ 2          | ≥ 32       |
| 50     | 1703413     | >128         | ≥ 32/16              | ≥ 128/4                 | ≥ 1           | ≥ 2          | ≥ 32       |
| 51     | 1704192     | >128         | ≥ 32/16              | ≥ 128/4                 | ≥ 1           | ≥ 2          | ≥ 32       |
| 52     | 1706017     | >128         | ≥ 32/16              | ≥ 128/4                 | ≥ 1           | ≥ 2          | ≥ 32       |



|     |         |      |         |         |        |        |      |
|-----|---------|------|---------|---------|--------|--------|------|
| 53  | 1707501 | >128 | ≧ 32/16 | ≧ 128/4 | ≧ 1    | ≧ 2    | ≧ 32 |
| 54  | 1707627 | >128 | ≧ 32/16 | ≧ 128/4 | ≧ 1    | ≧ 2    | ≧ 32 |
| 55  | 1710844 | >128 | ≧ 32/16 | ≧ 128/4 | ≧ 1    | ≧ 2    | ≧ 32 |
| 56  | 1711345 | >128 | ≧ 32/16 | ≧ 128/4 | ≧ 1    | ≧ 2    | ≧ 32 |
| 57  | 1711559 | >128 | ≧ 32/16 | ≧ 128/4 | ≧ 1    | ≧ 2    | ≧ 32 |
| 58  | 1711905 | >128 | ≧ 32/16 | ≧ 128/4 | ≧ 1    | ≧ 2    | ≧ 32 |
| 59  | 1712856 | >128 | ≧ 32/16 | ≧ 128/4 | ≧ 1    | ≧ 2    | ≧ 32 |
| 60  | 1713261 | >128 | ≧ 32/16 | ≧ 128/4 | ≧ 1    | ≧ 2    | ≧ 32 |
| 61  | 1713952 | >128 | ≧ 32/16 | ≧ 128/4 | ≧ 1    | ≧ 2    | ≧ 32 |
| 62  | 1714960 | >128 | ≧ 32/16 | ≧ 128/4 | ≧ 1    | ≧ 2    | ≧ 32 |
| 63  | 1715473 | >128 | ≧ 32/16 | ≧ 128/4 | ≧ 1    | ≧ 2    | ≧ 32 |
| 64  | 1716196 | >128 | ≧ 32/16 | ≧ 128/4 | ≧ 1    | ≧ 2    | ≧ 32 |
| 65  | 1717117 | >128 | ≧ 32/16 | ≧ 128/4 | ≧ 1    | ≧ 2    | ≧ 32 |
| 66  | 1717330 | >128 | ≧ 32/16 | ≧ 128/4 | ≧ 1    | ≧ 2    | ≧ 32 |
| 67  | 1718209 | >128 | ≧ 32/16 | ≧ 128/4 | ≧ 1    | ≧ 2    | ≧ 32 |
| 68  | 1718292 | >128 | ≧ 32/16 | ≧ 128/4 | ≧ 1    | ≧ 2    | ≧ 32 |
| 69  | 1718861 | >128 | ≧ 32/16 | ≧ 128/4 | ≧ 1    | ≧ 2    | ≧ 32 |
| 70  | 1719002 | >128 | ≧ 32/16 | ≧ 128/4 | ≧ 1    | ≧ 2    | ≧ 32 |
| 71  | 1719585 | >128 | ≧ 32/16 | ≧ 128/4 | ≧ 1    | ≧ 2    | ≧ 32 |
| 72  | 1720545 | >128 | ≧ 32/16 | ≧ 128/4 | ≧ 1    | ≧ 2    | ≧ 32 |
| 73  | 1722263 | >128 | ≧ 32/16 | ≧ 128/4 | ≧ 1    | ≧ 2    | ≧ 32 |
| 74  | 1722520 | >128 | ≧ 32/16 | ≧ 128/4 | ≧ 1    | ≧ 2    | ≧ 32 |
| 75  | 1722588 | >128 | ≧ 32/16 | ≧ 128/4 | ≧ 1    | ≧ 2    | ≧ 32 |
| 76  | 1722653 | >128 | ≧ 32/16 | ≧ 128/4 | ≧ 1    | ≧ 2    | ≧ 32 |
| 77  | 1722820 | >128 | ≧ 32/16 | ≧ 128/4 | ≧ 1    | ≧ 2    | ≧ 32 |
| 78  | 1723040 | >128 | ≧ 32/16 | ≧ 128/4 | ≧ 1    | ≧ 2    | ≧ 32 |
| 79  | 1724993 | >128 | ≧ 32/16 | ≧ 128/4 | ≧ 1    | ≧ 2    | ≧ 32 |
| 80  | 1725517 | >128 | ≧ 32/16 | ≧ 128/4 | ≧ 1    | ≧ 2    | ≧ 32 |
| 81  | 1725783 | >128 | ≧ 32/16 | ≧ 128/4 | ≧ 1    | ≧ 0.12 | ≧ 32 |
| 82  | 1727646 | >128 | ≧ 32/16 | ≧ 128/4 | ≧ 1    | ≧ 2    | ≧ 32 |
| 83  | 1728409 | >128 | ≧ 32/16 | ≧ 128/4 | ≧ 1    | ≧ 2    | ≧ 32 |
| 84  | 1728979 | >128 | ≧ 32/16 | ≧ 128/4 | ≧ 1    | ≧ 2    | ≧ 32 |
| 85  | 1729216 | >128 | ≧ 32/16 | ≧ 128/4 | ≧ 1    | ≧ 2    | ≧ 32 |
| 86  | 1729494 | >128 | ≧ 32/16 | ≧ 128/4 | ≧ 1    | ≧ 2    | ≧ 32 |
| 87  | 1732456 | >128 | ≧ 32/16 | ≧ 128/4 | ≧ 1    | ≧ 2    | ≧ 32 |
| 88  | 1732972 | >128 | ≧ 32/16 | ≧ 128/4 | ≧ 1    | ≧ 2    | ≧ 32 |
| 89  | 1733175 | >128 | ≧ 32/16 | ≧ 128/4 | ≧ 1    | ≧ 2    | ≧ 32 |
| 90  | 1733558 | >128 | ≧ 32/16 | ≧ 128/4 | ≧ 1    | ≧ 2    | ≧ 32 |
| 91  | 1735030 | >128 | ≧ 32/16 | ≧ 128/4 | ≧ 1    | ≧ 2    | ≧ 32 |
| 92  | 1736316 | >128 | ≧ 32/16 | ≧ 128/4 | ≧ 1    | ≧ 2    | ≧ 32 |
| 93  | 1736478 | >128 | ≧ 32/16 | ≧ 128/4 | ≧ 1    | ≧ 2    | ≧ 32 |
| 94  | 1736545 | >128 | ≧ 32/16 | ≧ 128/4 | ≧ 0.05 | ≧ 0.12 | ≧ 32 |
| 95  | 1736849 | >128 | ≧ 32/16 | ≧ 128/4 | ≧ 1    | ≧ 2    | ≧ 32 |
| 96  | 1737908 | >128 | ≧ 32/16 | ≧ 128/4 | ≧ 1    | ≧ 2    | ≧ 32 |
| 97  | 1738572 | >128 | ≧ 32/16 | ≧ 128/4 | ≧ 1    | ≧ 2    | ≧ 32 |
| 98  | 1738637 | >128 | ≧ 32/16 | ≧ 128/4 | ≧ 1    | ≧ 2    | ≧ 32 |
| 99  | 1739659 | >128 | ≧ 32/16 | ≧ 128/4 | ≧ 1    | ≧ 2    | ≧ 32 |
| 100 | 1739709 | >128 | ≧ 32/16 | ≧ 128/4 | ≧ 1    | ≧ 2    | ≧ 32 |
| 101 | 1740093 | >128 | ≧ 32/16 | ≧ 128/4 | ≧ 1    | ≧ 2    | ≧ 32 |
| 102 | 1740266 | >128 | ≧ 32/16 | ≧ 128/4 | ≧ 1    | ≧ 2    | ≧ 32 |
| 103 | 1741070 | >128 | ≧ 32/16 | ≧ 128/4 | ≧ 1    | ≧ 2    | ≧ 32 |
| 104 | 1746779 | >128 | ≧ 32/16 | ≧ 128/4 | ≧ 1    | ≧ 2    | ≧ 32 |
| 105 | 1748811 | >128 | ≧ 32/16 | ≧ 128/4 | ≧ 1    | ≧ 2    | ≧ 32 |
| 106 | 1749608 | >128 | ≧ 32/16 | ≧ 128/4 | ≧ 1    | ≧ 2    | ≧ 32 |

|     |         |      |         |         |        |        |      |
|-----|---------|------|---------|---------|--------|--------|------|
| 107 | 1749979 | >128 | ≧ 32/16 | ≧ 128/4 | ≧ 1    | ≧ 2    | ≧ 32 |
| 108 | 1750181 | >128 | ≧ 32/16 | ≧ 128/4 | ≧ 1    | ≧ 2    | ≧ 32 |
| 109 | 1750600 | >128 | ≧ 32/16 | ≧ 128/4 | ≧ 1    | ≧ 2    | ≧ 32 |
| 110 | 1750762 | >128 | ≧ 32/16 | ≧ 128/4 | ≧ 1    | ≧ 2    | ≧ 32 |
| 111 | 1751643 | >128 | ≧ 32/16 | ≧ 128/4 | ≧ 1    | ≧ 2    | ≧ 32 |
| 112 | 1752526 | >128 | ≧ 32/16 | ≧ 128/4 | ≧ 1    | ≧ 2    | ≧ 32 |
| 113 | 1753504 | >128 | ≧ 32/16 | ≧ 128/4 | ≧ 1    | ≧ 2    | ≧ 32 |
| 114 | 1753816 | >128 | ≧ 32/16 | ≧ 128/4 | ≧ 1    | ≧ 2    | ≧ 32 |
| 115 | 1755284 | >128 | ≧ 32/16 | ≧ 128/4 | ≦ 0.05 | ≦ 0.12 | ≧ 32 |
| 116 | 1755340 | >128 | ≧ 32/16 | ≧ 128/4 | ≧ 1    | ≧ 2    | ≧ 32 |
| 117 | 1756051 | >128 | ≧ 32/16 | ≧ 128/4 | ≧ 1    | ≧ 2    | ≧ 32 |
| 118 | 1756142 | >128 | ≧ 32/16 | ≧ 128/4 | ≧ 1    | ≧ 2    | ≧ 32 |
| 119 | 1757201 | >128 | ≧ 32/16 | ≧ 128/4 | ≧ 1    | ≧ 2    | ≧ 32 |
| 120 | 1757736 | >128 | ≧ 32/16 | ≧ 128/4 | ≧ 1    | ≧ 2    | ≧ 32 |
| 121 | 1758330 | >128 | ≧ 32/16 | ≧ 128/4 | ≧ 1    | ≧ 2    | ≧ 32 |
| 122 | 1758395 | >128 | ≧ 32/16 | ≧ 128/4 | ≧ 1    | ≧ 2    | ≧ 32 |
| 123 | 1758448 | >128 | ≧ 32/16 | ≧ 128/4 | ≧ 1    | ≧ 2    | ≧ 32 |
| 124 | 1759555 | >128 | ≧ 32/16 | ≧ 128/4 | ≧ 1    | ≧ 2    | ≧ 32 |
| 125 | 1759817 | >128 | ≧ 32/16 | ≧ 128/4 | ≦ 0.05 | ≦ 0.12 | ≧ 32 |
| 126 | 1760643 | >128 | ≧ 32/16 | ≧ 128/4 | ≧ 1    | ≧ 2    | ≧ 32 |
| 127 | 1761292 | >128 | ≧ 32/16 | ≧ 128/4 | ≧ 1    | ≧ 2    | ≧ 32 |
| 128 | 1761352 | >128 | ≧ 32/16 | ≧ 128/4 | ≧ 1    | ≧ 2    | ≧ 32 |
| 129 | 1762617 | >128 | ≧ 32/16 | ≧ 128/4 | ≧ 1    | ≧ 2    | ≧ 32 |
| 130 | 1762843 | >128 | ≧ 32/16 | ≧ 128/4 | ≧ 1    | ≧ 2    | ≧ 32 |
| 131 | 1763053 | >128 | ≧ 32/16 | ≧ 128/4 | ≧ 1    | ≧ 2    | ≧ 32 |
| 132 | 1763080 | >128 | ≧ 32/16 | ≧ 128/4 | ≧ 1    | ≧ 2    | ≧ 32 |
| 133 | 1765040 | >128 | ≧ 32/16 | ≧ 128/4 | ≧ 1    | ≧ 2    | ≧ 32 |
| 134 | 1765508 | >128 | ≧ 32/16 | ≧ 128/4 | ≧ 1    | ≧ 2    | ≧ 32 |
| 135 | 1765923 | >128 | ≧ 32/16 | ≧ 128/4 | ≧ 1    | ≧ 2    | ≧ 32 |
| 136 | 1766094 | >128 | ≧ 32/16 | ≧ 128/4 | ≧ 1    | ≧ 2    | ≧ 32 |
| 137 | 1766123 | >128 | ≧ 32/16 | ≧ 128/4 | ≧ 1    | ≧ 2    | ≧ 32 |
| 138 | 1766176 | >128 | ≧ 32/16 | ≧ 128/4 | ≧ 1    | ≧ 2    | ≧ 32 |
| 139 | 1766198 | >128 | ≧ 32/16 | ≧ 128/4 | ≧ 1    | ≧ 2    | ≧ 32 |
| 140 | 1766489 | >128 | ≧ 32/16 | ≧ 128/4 | ≧ 1    | ≧ 2    | ≧ 32 |
| 141 | 1767244 | >128 | ≧ 32/16 | ≧ 128/4 | ≧ 1    | ≧ 2    | ≧ 32 |
| 142 | 1767348 | >128 | ≧ 32/16 | ≧ 128/4 | ≧ 1    | ≧ 2    | ≧ 32 |
| 143 | 1768100 | >128 | ≧ 32/16 | ≧ 128/4 | ≧ 1    | ≧ 2    | ≧ 32 |
| 144 | 1769562 | >128 | ≧ 32/16 | ≧ 128/4 | ≧ 1    | ≧ 2    | ≧ 32 |
| 145 | 1769847 | >128 | ≧ 32/16 | ≧ 128/4 | ≧ 1    | ≧ 2    | ≧ 32 |
| 146 | 1770111 | >128 | ≧ 32/16 | ≧ 128/4 | ≧ 1    | ≧ 2    | ≧ 32 |
| 147 | 1770177 | >128 | ≧ 32/16 | ≧ 128/4 | ≧ 1    | ≧ 2    | ≧ 32 |
| 148 | 1770730 | >128 | ≧ 32/16 | ≧ 128/4 | ≧ 1    | ≧ 2    | ≧ 32 |
| 149 | 1771549 | >128 | ≧ 32/16 | ≧ 128/4 | ≧ 1    | ≧ 2    | ≧ 32 |
| 150 | 1772176 | >128 | ≧ 32/16 | ≧ 128/4 | ≧ 1    | ≧ 2    | ≧ 32 |
| 151 | 1772963 | >128 | ≧ 32/16 | ≧ 128/4 | ≧ 1    | ≧ 2    | ≧ 32 |
| 152 | 1773213 | >128 | ≧ 32/16 | ≧ 128/4 | ≧ 1    | ≧ 2    | ≧ 32 |
| 153 | 1773735 | >128 | ≧ 32/16 | ≧ 128/4 | ≧ 1    | ≧ 2    | ≧ 32 |
| 154 | 1774722 | >128 | ≧ 32/16 | ≧ 128/4 | ≧ 1    | ≧ 2    | ≧ 32 |
| 155 | 1775047 | >128 | ≧ 32/16 | ≧ 128/4 | ≧ 1    | ≧ 2    | ≧ 32 |
| 156 | 1775557 | >128 | ≧ 32/16 | ≧ 128/4 | ≧ 1    | ≧ 2    | ≧ 32 |
| 157 | 1775768 | >128 | ≧ 32/16 | ≧ 128/4 | ≧ 1    | ≧ 2    | ≧ 32 |
| 158 | 1776183 | >128 | ≧ 32/16 | ≧ 128/4 | ≧ 1    | ≧ 2    | ≧ 32 |
| 159 | 1776245 | >128 | ≧ 32/16 | ≧ 128/4 | ≧ 1    | ≧ 2    | ≧ 32 |
| 160 | 1776929 | >128 | ≧ 32/16 | ≧ 128/4 | ≧ 1    | ≧ 2    | ≧ 32 |

|     |         |      |         |         |        |        |      |
|-----|---------|------|---------|---------|--------|--------|------|
| 161 | 1777669 | >128 | ≧ 32/16 | ≧ 128/4 | ≧ 1    | ≧ 2    | ≧ 32 |
| 162 | 1778511 | >128 | ≧ 32/16 | ≧ 128/4 | ≧ 1    | ≧ 2    | ≧ 32 |
| 163 | 1779476 | >128 | ≧ 32/16 | ≧ 128/4 | ≧ 1    | ≧ 2    | ≧ 32 |
| 164 | 1779744 | >128 | ≧ 32/16 | ≧ 128/4 | ≧ 1    | ≧ 2    | ≧ 32 |
| 165 | 1780136 | >128 | ≧ 32/16 | ≧ 128/4 | ≧ 1    | ≧ 2    | ≧ 32 |
| 166 | 1780855 | >128 | ≧ 32/16 | ≧ 128/4 | ≧ 1    | ≧ 2    | ≧ 32 |
| 167 | 1781129 | >128 | ≧ 32/16 | ≧ 128/4 | ≧ 1    | ≧ 2    | ≧ 32 |
| 168 | 1782896 | >128 | ≧ 32/16 | ≧ 128/4 | ≦ 0.05 | ≦ 0.12 | ≧ 32 |
| 169 | 1783150 | >128 | ≧ 32/16 | ≧ 128/4 | ≧ 1    | ≧ 2    | ≧ 32 |
| 170 | 1785644 | >128 | ≧ 32/16 | ≧ 128/4 | ≧ 1    | ≧ 2    | ≧ 32 |
| 171 | 1786611 | >128 | ≧ 32/16 | ≧ 128/4 | ≧ 1    | ≧ 2    | ≧ 32 |
| 172 | 1786730 | >128 | ≧ 32/16 | ≧ 128/4 | ≧ 1    | ≧ 2    | ≧ 32 |
| 173 | 1787863 | >128 | ≧ 32/16 | ≧ 128/4 | ≧ 1    | ≧ 2    | ≧ 32 |
| 174 | 1788964 | >128 | ≧ 32/16 | ≧ 128/4 | ≧ 1    | ≧ 2    | ≧ 32 |
| 175 | 1789110 | >128 | ≧ 32/16 | ≧ 128/4 | ≧ 1    | ≧ 2    | ≧ 32 |
| 176 | 1789592 | >128 | ≧ 32/16 | ≧ 128/4 | ≧ 1    | ≧ 2    | ≧ 32 |
| 177 | 1789827 | >128 | ≧ 32/16 | ≧ 128/4 | ≧ 1    | ≧ 2    | ≧ 32 |
| 178 | 1789833 | >128 | ≧ 32/16 | ≧ 128/4 | ≧ 1    | ≧ 2    | ≧ 32 |
| 179 | 1790155 | >128 | ≧ 32/16 | ≧ 128/4 | ≧ 1    | ≧ 2    | ≧ 32 |
| 180 | 1793330 | >128 | ≧ 32/16 | ≧ 128/4 | ≧ 1    | ≧ 2    | ≧ 32 |
| 181 | 1795261 | >128 | ≧ 32/16 | ≧ 128/4 | ≧ 1    | ≧ 2    | ≧ 32 |
| 182 | 1796385 | >128 | ≧ 32/16 | ≧ 128/4 | ≦ 0.05 | ≦ 0.12 | ≧ 32 |
| 183 | 1796449 | >128 | ≧ 32/16 | ≧ 128/4 | ≧ 1    | ≧ 2    | ≧ 32 |
| 184 | 1798073 | >128 | ≧ 32/16 | ≧ 128/4 | ≧ 1    | ≧ 2    | ≧ 32 |
| 185 | 1798991 | >128 | ≧ 32/16 | ≧ 128/4 | ≧ 1    | ≧ 2    | ≧ 32 |
| 186 | 1800441 | >128 | ≧ 32/16 | ≧ 128/4 | ≧ 1    | ≧ 2    | ≧ 32 |
| 187 | 1800637 | >128 | ≧ 32/16 | ≧ 128/4 | ≧ 1    | ≧ 2    | ≧ 32 |
| 188 | 1802164 | >128 | ≧ 32/16 | ≧ 128/4 | ≧ 1    | ≧ 2    | ≧ 32 |
| 189 | 1802353 | >128 | ≧ 32/16 | ≧ 128/4 | ≧ 1    | ≧ 2    | ≧ 32 |
| 190 | 1803598 | >128 | ≧ 32/16 | ≧ 128/4 | ≧ 1    | ≧ 2    | ≧ 32 |
| 191 | 1807531 | >128 | ≧ 32/16 | ≧ 128/4 | ≧ 1    | ≧ 2    | ≧ 32 |
| 192 | 1809155 | >128 | ≧ 32/16 | ≧ 128/4 | ≧ 1    | ≧ 2    | ≧ 32 |
| 193 | 1809300 | >128 | ≧ 32/16 | ≧ 128/4 | ≧ 1    | ≧ 2    | ≧ 32 |
| 194 | 1809481 | >128 | ≧ 32/16 | ≧ 128/4 | ≧ 1    | ≧ 2    | ≧ 32 |
| 195 | 1811703 | >128 | ≧ 32/16 | ≧ 128/4 | ≧ 1    | ≧ 2    | ≧ 32 |
| 196 | 1812416 | >128 | ≧ 32/16 | ≧ 128/4 | ≧ 1    | ≧ 2    | ≧ 32 |
| 197 | 1812894 | >128 | ≧ 32/16 | ≧ 128/4 | ≧ 1    | ≧ 2    | ≧ 32 |
| 198 | 1813076 | >128 | ≧ 32/16 | ≧ 128/4 | ≧ 1    | ≧ 2    | ≧ 32 |
| 199 | 1815884 | >128 | ≧ 32/16 | ≧ 128/4 | ≧ 1    | ≧ 2    | ≧ 32 |
| 200 | 1816127 | >128 | ≧ 32/16 | ≧ 128/4 | ≧ 1    | ≧ 2    | ≧ 32 |
| 201 | 1817365 | >128 | ≧ 32/16 | ≧ 128/4 | ≧ 1    | ≧ 2    | ≧ 32 |
| 202 | 1819146 | >128 | ≧ 32/16 | ≧ 128/4 | ≧ 1    | ≧ 2    | ≧ 32 |
| 203 | 1819758 | >128 | ≧ 32/16 | ≧ 128/4 | ≧ 1    | ≧ 2    | ≧ 32 |
| 204 | 1820477 | >128 | ≧ 32/16 | ≧ 128/4 | ≧ 1    | ≧ 2    | ≧ 32 |
| 205 | 1821991 | >128 | ≧ 32/16 | ≧ 128/4 | ≧ 1    | ≧ 2    | ≧ 32 |
| 206 | 1822057 | >128 | ≧ 32/16 | ≧ 128/4 | ≧ 1    | ≧ 2    | ≧ 32 |
| 207 | 1822430 | >128 | ≧ 32/16 | ≧ 128/4 | ≧ 1    | ≧ 2    | ≧ 32 |
| 208 | 1822599 | >128 | ≧ 32/16 | ≧ 128/4 | ≧ 1    | ≧ 2    | ≧ 32 |
| 209 | 1823146 | >128 | ≧ 32/16 | ≧ 128/4 | ≧ 1    | ≧ 2    | ≧ 32 |
| 210 | 1824014 | >128 | ≧ 32/16 | ≧ 128/4 | ≧ 1    | ≧ 2    | ≧ 32 |
| 211 | 1824858 | >128 | ≧ 32/16 | ≧ 128/4 | ≧ 1    | ≧ 2    | ≧ 32 |
| 212 | 1825262 | >128 | ≧ 32/16 | ≧ 128/4 | ≧ 1    | ≧ 2    | ≧ 32 |
| 213 | 1825889 | >128 | ≧ 32/16 | ≧ 128/4 | ≧ 1    | ≧ 2    | ≧ 32 |
| 214 | 1826017 | >128 | ≧ 32/16 | ≧ 128/4 | ≧ 1    | ≧ 2    | ≧ 32 |

|     |         |      |         |         |     |        |      |
|-----|---------|------|---------|---------|-----|--------|------|
| 215 | 1826067 | >128 | ≧ 32/16 | ≧ 128/4 | ≧ 1 | ≧ 2    | ≧ 32 |
| 216 | 1826174 | >128 | ≧ 32/16 | ≧ 128/4 | ≧ 1 | ≧ 2    | ≧ 32 |
| 217 | 1826332 | >128 | ≧ 32/16 | ≧ 128/4 | ≧ 1 | ≧ 2    | ≧ 32 |
| 218 | 1826389 | >128 | ≧ 32/16 | ≧ 128/4 | ≧ 1 | ≧ 2    | ≧ 32 |
| 219 | 1826466 | >128 | ≧ 32/16 | ≧ 128/4 | ≧ 1 | ≧ 2    | ≧ 32 |
| 220 | 1826503 | >128 | ≧ 32/16 | ≧ 128/4 | ≧ 1 | ≧ 2    | ≧ 32 |
| 221 | 1826507 | >128 | ≧ 32/16 | ≧ 128/4 | ≧ 1 | ≧ 2    | ≧ 32 |
| 222 | 1826858 | >128 | ≧ 32/16 | ≧ 128/4 | ≧ 1 | ≧ 2    | ≧ 32 |
| 223 | 1827255 | >128 | ≧ 32/16 | ≧ 128/4 | ≧ 1 | ≧ 2    | ≧ 32 |
| 224 | 1827473 | >128 | ≧ 32/16 | ≧ 128/4 | ≧ 1 | ≧ 2    | ≧ 32 |
| 225 | 1827500 | >128 | ≧ 32/16 | ≧ 128/4 | ≧ 1 | ≦ 0.12 | ≧ 32 |
| 226 | 1828232 | >128 | ≧ 32/16 | ≧ 128/4 | ≧ 1 | ≧ 2    | ≧ 32 |
| 227 | 1829427 | >128 | ≧ 32/16 | ≧ 128/4 | ≧ 1 | ≧ 2    | ≧ 32 |
| 228 | 1829496 | >128 | ≧ 32/16 | ≧ 128/4 | ≧ 1 | ≧ 2    | ≧ 32 |
| 229 | 1829525 | >128 | ≧ 32/16 | ≧ 128/4 | ≧ 1 | ≧ 2    | ≧ 32 |
| 230 | 1830110 | >128 | ≧ 32/16 | ≧ 128/4 | ≧ 1 | ≧ 2    | ≧ 32 |
| 231 | 1831141 | >128 | ≧ 32/16 | ≧ 128/4 | ≧ 1 | ≧ 2    | ≧ 32 |
| 232 | 1832787 | >128 | ≧ 32/16 | ≧ 128/4 | ≧ 1 | ≧ 2    | ≧ 32 |
| 233 | 1833087 | >128 | ≧ 32/16 | ≧ 128/4 | ≧ 1 | ≧ 2    | ≧ 32 |
| 234 | 1833255 | >128 | ≧ 32/16 | ≧ 128/4 | ≧ 1 | ≧ 2    | ≧ 32 |
| 235 | 1833931 | >128 | ≧ 32/16 | ≧ 128/4 | ≧ 1 | ≧ 2    | ≧ 32 |
| 236 | 1834695 | >128 | ≧ 32/16 | ≧ 128/4 | ≧ 1 | ≧ 2    | ≧ 32 |
| 237 | 1836111 | >128 | ≧ 32/16 | ≧ 128/4 | ≧ 1 | ≧ 2    | ≧ 32 |
| 238 | 1836927 | >128 | ≧ 32/16 | ≧ 128/4 | ≧ 1 | ≧ 2    | ≧ 32 |
| 239 | 1837981 | >128 | ≧ 32/16 | ≧ 128/4 | ≧ 1 | ≧ 2    | ≧ 32 |
| 240 | 1839209 | >128 | ≧ 32/16 | ≧ 128/4 | ≧ 1 | ≧ 2    | ≧ 32 |
| 241 | 1843688 | >128 | ≧ 32/16 | ≧ 128/4 | ≧ 1 | ≧ 2    | ≧ 32 |
| 242 | 1844885 | >128 | ≧ 32/16 | ≧ 128/4 | ≧ 1 | ≧ 2    | ≧ 32 |
| 243 | 1848366 | >128 | ≧ 32/16 | ≧ 128/4 | ≧ 1 | ≧ 2    | ≧ 32 |
| 244 | 1848507 | >128 | ≧ 32/16 | ≧ 128/4 | ≧ 1 | ≧ 2    | ≧ 32 |

Table 3

| Number | Patients ID | Ceftazidime | Cefepime | Aztreonam | Amikacin | Gentamicin | Fosfomicin | Tigecycline | Trimethoprim-sulfamethoxazole |
|--------|-------------|-------------|----------|-----------|----------|------------|------------|-------------|-------------------------------|
| 1      | 1211008     | ≥ 16        | ≥ 16     | ≥ 16      | ≥ 64     | ≥ 16       | ≥ 256      | ≤ 1         | ≥4/76                         |
| 2      | 1255707     | ≥ 16        | ≥ 16     | ≥ 16      | ≤ 16     | ≤ 4        | ≥ 256      | ≤ 1         | ≥4/76                         |
| 3      | 1387145     | ≥ 16        | ≥ 16     | ≥ 16      | ≥ 64     | ≥ 16       | ≤ 64       | ≤ 1         | ≥4/76                         |
| 4      | 1435940     | ≥ 16        | ≥ 16     | ≥ 16      | ≥ 64     | ≥ 16       | ≥ 256      | ≤ 1         | ≥4/76                         |
| 5      | 1457348     | ≥ 16        | ≥ 16     | ≥ 16      | ≥ 64     | ≥ 16       | ≥ 256      | ≤ 1         | ≥4/76                         |
| 6      | 1467859     | ≥ 16        | ≥ 16     | ≥ 16      | ≥ 64     | ≥ 16       | ≤ 64       | ≤ 1         | ≥4/76                         |
| 7      | 1603858     | ≥ 16        | ≥ 16     | ≥ 16      | ≥ 64     | ≥ 16       | ≥ 256      | ≤ 1         | ≥4/76                         |
| 8      | 1628916     | ≥ 16        | ≥ 16     | ≥ 16      | ≥ 64     | ≥ 16       | ≥ 256      | ≤ 1         | ≥4/76                         |
| 9      | 1631286     | ≥ 16        | ≥ 16     | ≥ 16      | ≥ 64     | ≥ 16       | ≤ 64       | ≤ 1         | ≥4/76                         |
| 10     | 1643835     | ≥ 16        | ≥ 16     | ≥ 16      | ≥ 64     | ≥ 16       | ≥ 256      | ≤ 1         | ≥4/76                         |
| 11     | 1654306     | ≤ 4         | ≤ 2      | ≥ 16      | ≤ 16     | ≤ 4        | ≥ 256      | ≥ 4         | ≥4/76                         |
| 12     | 1655141     | ≥ 16        | ≥ 16     | ≥ 16      | ≥ 64     | ≥ 16       | ≤ 64       | ≤ 1         | ≥4/76                         |
| 13     | 1673544     | ≥ 16        | ≥ 16     | ≥ 16      | ≥ 64     | ≥ 16       | ≥ 256      | ≤ 1         | ≥4/76                         |
| 14     | 1674016     | ≥ 16        | ≥ 16     | ≥ 16      | ≥ 64     | ≥ 16       | ≥ 256      | ≤ 1         | ≥4/76                         |
| 15     | 1676693     | ≥ 16        | ≥ 16     | ≥ 16      | ≥ 64     | ≥ 16       | ≥ 256      | ≤ 1         | ≥4/76                         |
| 16     | 1676967     | ≥ 16        | ≥ 16     | ≥ 16      | ≥ 64     | ≥ 16       | ≤ 64       | ≤ 1         | ≥4/76                         |
| 17     | 1677363     | ≥ 16        | ≥ 16     | ≥ 16      | ≥ 64     | ≥ 16       | ≥ 256      | ≤ 1         | ≥4/76                         |
| 18     | 1677521     | ≥ 16        | ≥ 16     | ≥ 16      | ≥ 64     | ≥ 16       | ≥ 256      | ≤ 1         | ≥4/76                         |
| 19     | 1678002     | ≥ 16        | ≥ 16     | ≥ 16      | ≤ 16     | ≥ 16       | ≤ 64       | ≥ 4         | ≥4/76                         |
| 20     | 1678087     | ≥ 16        | ≥ 16     | ≥ 16      | ≤ 16     | ≤ 4        | ≥ 256      | ≤ 1         | ≥4/76                         |
| 21     | 1678329     | ≥ 16        | ≥ 16     | ≥ 16      | ≥ 64     | ≥ 16       | ≥ 256      | ≤ 1         | ≥4/76                         |
| 22     | 1679510     | ≥ 16        | ≥ 16     | ≥ 16      | ≥ 64     | ≥ 16       | ≤ 64       | ≤ 1         | ≥4/76                         |
| 23     | 1681169     | ≥ 16        | ≥ 16     | ≥ 16      | ≥ 64     | ≥ 16       | ≥ 256      | ≤ 1         | ≥4/76                         |
| 24     | 1681287     | ≥ 16        | ≥ 16     | ≥ 16      | ≥ 64     | ≥ 16       | ≥ 256      | ≥ 4         | ≥4/76                         |
| 25     | 1681407     | ≥ 16        | ≥ 16     | ≥ 16      | ≤ 16     | ≤ 4        | ≥ 256      | ≤ 1         | ≥4/76                         |
| 26     | 1681610     | ≥ 16        | ≥ 16     | ≥ 16      | ≥ 64     | ≥ 16       | ≤ 64       | ≤ 1         | ≥4/76                         |
| 27     | 1683217     | ≥ 16        | ≥ 16     | ≥ 16      | ≥ 64     | ≥ 16       | ≤ 64       | ≤ 1         | ≥4/76                         |
| 28     | 1683428     | ≥ 16        | ≥ 16     | ≥ 16      | ≥ 64     | ≥ 16       | ≥ 256      | ≤ 1         | ≥4/76                         |
| 29     | 1683853     | ≥ 16        | ≥ 16     | ≥ 16      | ≥ 64     | ≥ 16       | ≥ 256      | ≤ 1         | ≥4/76                         |
| 30     | 1683893     | ≥ 16        | ≥ 16     | ≥ 16      | ≥ 64     | ≥ 16       | ≥ 256      | ≤ 1         | ≥4/76                         |
| 31     | 1684044     | ≥ 16        | ≥ 16     | ≥ 16      | ≥ 64     | ≥ 16       | ≤ 64       | ≤ 1         | ≥4/76                         |
| 32     | 1684190     | ≥ 16        | ≥ 16     | ≥ 16      | ≤ 16     | ≥ 16       | ≥ 256      | ≤ 1         | ≥4/76                         |
| 33     | 1684510     | ≥ 16        | ≥ 16     | ≥ 16      | ≥ 64     | ≥ 16       | ≥ 256      | ≤ 1         | ≥4/76                         |
| 34     | 1684821     | ≥ 16        | ≥ 16     | ≥ 16      | ≤ 16     | ≥ 16       | ≤ 64       | ≤ 1         | ≥4/76                         |
| 35     | 1685440     | ≥ 16        | ≥ 16     | ≥ 16      | ≥ 64     | ≥ 16       | ≥ 256      | ≤ 1         | ≥4/76                         |
| 36     | 1687366     | ≥ 16        | ≥ 16     | ≥ 16      | ≥ 64     | ≥ 16       | ≤ 64       | ≤ 1         | ≥4/76                         |
| 37     | 1688971     | ≤ 4         | ≤ 2      | ≥ 16      | ≥ 64     | ≥ 16       | ≥ 256      | ≤ 1         | ≥4/76                         |
| 38     | 1689120     | ≥ 16        | ≥ 16     | ≥ 16      | ≥ 64     | ≥ 16       | ≥ 256      | ≤ 1         | ≥4/76                         |
| 39     | 1689894     | ≥ 16        | ≥ 16     | ≥ 16      | ≤ 16     | ≥ 16       | ≥ 256      | ≤ 1         | ≥4/76                         |
| 40     | 1690370     | ≥ 16        | ≥ 16     | ≥ 16      | ≥ 64     | ≥ 16       | ≥ 256      | ≤ 1         | ≥4/76                         |
| 41     | 1691389     | ≥ 16        | ≥ 16     | ≥ 16      | ≥ 64     | ≥ 16       | ≤ 64       | ≤ 1         | ≥4/76                         |
| 42     | 1692011     | ≥ 16        | ≥ 16     | ≥ 16      | ≥ 64     | ≥ 16       | ≥ 256      | ≤ 1         | ≥4/76                         |
| 43     | 1695674     | ≥ 16        | ≥ 16     | ≥ 16      | ≥ 64     | ≥ 16       | ≥ 256      | ≤ 1         | ≥4/76                         |
| 44     | 1696129     | ≥ 16        | ≥ 16     | ≥ 16      | ≤ 16     | ≥ 16       | ≤ 64       | ≤ 1         | ≥4/76                         |
| 45     | 1696670     | ≥ 16        | ≥ 16     | ≥ 16      | ≥ 64     | ≥ 16       | ≥ 256      | ≥ 4         | ≥4/76                         |
| 46     | 1698113     | ≥ 16        | ≥ 16     | ≥ 16      | ≥ 64     | ≥ 16       | ≥ 256      | ≤ 1         | ≥4/76                         |
| 47     | 1700328     | ≥ 16        | ≥ 16     | ≥ 16      | ≥ 64     | ≥ 16       | ≥ 256      | ≤ 1         | ≥4/76                         |
| 48     | 1700934     | ≥ 16        | ≥ 16     | ≥ 16      | ≥ 64     | ≥ 16       | ≤ 64       | ≤ 1         | ≥4/76                         |
| 49     | 1702475     | ≥ 16        | ≥ 16     | ≥ 16      | ≤ 16     | ≥ 16       | ≥ 256      | ≤ 1         | ≥4/76                         |
| 50     | 1703413     | ≥ 16        | ≥ 16     | ≥ 16      | ≥ 64     | ≥ 16       | ≥ 256      | ≤ 1         | ≥4/76                         |
| 51     | 1704192     | ≥ 16        | ≥ 16     | ≥ 16      | ≥ 64     | ≥ 16       | ≥ 256      | ≤ 1         | ≥4/76                         |
| 52     | 1706017     | ≥ 16        | ≥ 16     | ≥ 16      | ≥ 64     | ≥ 16       | ≤ 64       | ≤ 1         | ≥4/76                         |

|     |         |      |      |      |      |      |       |     |       |
|-----|---------|------|------|------|------|------|-------|-----|-------|
| 53  | 1707501 | ≥ 16 | ≥ 16 | ≥ 16 | ≤ 16 | ≥ 16 | ≥ 256 | ≤ 1 | ≥4/76 |
| 54  | 1707627 | ≥ 16 | ≥ 16 | ≥ 16 | ≥ 64 | ≥ 16 | ≥ 256 | ≤ 1 | ≥4/76 |
| 55  | 1710844 | ≥ 16 | ≥ 16 | ≥ 16 | ≥ 64 | ≥ 16 | ≥ 256 | ≤ 1 | ≥4/76 |
| 56  | 1711345 | ≥ 16 | ≥ 16 | ≥ 16 | ≥ 64 | ≥ 16 | ≥ 256 | ≤ 1 | ≥4/76 |
| 57  | 1711559 | ≥ 16 | ≥ 16 | ≥ 16 | ≥ 64 | ≥ 16 | ≤ 64  | ≤ 1 | ≥4/76 |
| 58  | 1711905 | ≥ 16 | ≥ 16 | ≥ 16 | ≤ 16 | ≥ 16 | ≥ 256 | ≤ 1 | ≥4/76 |
| 59  | 1712856 | ≥ 16 | ≥ 16 | ≥ 16 | ≥ 64 | ≥ 16 | ≥ 256 | ≤ 1 | ≥4/76 |
| 60  | 1713261 | ≥ 16 | ≥ 16 | ≥ 16 | ≥ 64 | ≥ 16 | ≤ 64  | ≤ 1 | ≥4/76 |
| 61  | 1713952 | ≥ 16 | ≥ 16 | ≥ 16 | ≥ 64 | ≥ 16 | ≤ 64  | ≤ 1 | ≥4/76 |
| 62  | 1714960 | ≥ 16 | ≥ 16 | ≥ 16 | ≤ 16 | ≥ 16 | ≥ 256 | ≤ 1 | ≥4/76 |
| 63  | 1715473 | ≥ 16 | ≥ 16 | ≥ 16 | ≥ 64 | ≥ 16 | ≥ 256 | ≥ 4 | ≥4/76 |
| 64  | 1716196 | ≥ 16 | ≥ 16 | ≥ 16 | ≥ 64 | ≥ 16 | ≤ 64  | ≤ 1 | ≥4/76 |
| 65  | 1717117 | ≥ 16 | ≥ 16 | ≥ 16 | ≥ 64 | ≥ 16 | ≥ 256 | ≤ 1 | ≥4/76 |
| 66  | 1717330 | ≥ 16 | ≥ 16 | ≥ 16 | ≥ 64 | ≥ 16 | ≥ 256 | ≤ 1 | ≥4/76 |
| 67  | 1718209 | ≥ 16 | ≥ 16 | ≥ 16 | ≥ 64 | ≥ 16 | ≤ 64  | ≤ 1 | ≥4/76 |
| 68  | 1718292 | ≥ 16 | ≥ 16 | ≥ 16 | ≥ 64 | ≥ 16 | ≥ 256 | ≤ 1 | ≥4/76 |
| 69  | 1718861 | ≥ 16 | ≥ 16 | ≥ 16 | ≥ 64 | ≥ 16 | ≥ 256 | ≤ 1 | ≥4/76 |
| 70  | 1719002 | ≥ 16 | ≥ 16 | ≥ 16 | ≤ 16 | ≥ 16 | ≥ 256 | ≤ 1 | ≥4/76 |
| 71  | 1719585 | ≥ 16 | ≥ 16 | ≥ 16 | ≥ 64 | ≥ 16 | ≥ 256 | ≤ 1 | ≥4/76 |
| 72  | 1720545 | ≥ 16 | ≥ 16 | ≥ 16 | ≥ 64 | ≥ 16 | ≤ 64  | ≤ 1 | ≥4/76 |
| 73  | 1722263 | ≥ 16 | ≥ 16 | ≥ 16 | ≥ 64 | ≥ 16 | ≥ 256 | ≤ 1 | ≥4/76 |
| 74  | 1722520 | ≥ 16 | ≥ 16 | ≥ 16 | ≥ 64 | ≥ 16 | ≥ 256 | ≤ 1 | ≥4/76 |
| 75  | 1722588 | ≥ 16 | ≥ 16 | ≥ 16 | ≥ 64 | ≥ 16 | ≥ 256 | ≤ 1 | ≥4/76 |
| 76  | 1722653 | ≥ 16 | ≥ 16 | ≥ 16 | ≥ 64 | ≥ 16 | ≥ 256 | ≤ 1 | ≥4/76 |
| 77  | 1722820 | ≥ 16 | ≥ 16 | ≥ 16 | ≥ 64 | ≥ 16 | ≤ 64  | ≤ 1 | ≥4/76 |
| 78  | 1723040 | ≥ 16 | ≥ 16 | ≥ 16 | ≥ 64 | ≥ 16 | ≥ 256 | ≤ 1 | ≥4/76 |
| 79  | 1724993 | ≥ 16 | ≥ 16 | ≥ 16 | ≤ 16 | ≥ 16 | ≤ 64  | ≤ 1 | ≥4/76 |
| 80  | 1725517 | ≥ 16 | ≥ 16 | ≥ 16 | ≥ 64 | ≥ 16 | ≥ 256 | ≤ 1 | ≥4/76 |
| 81  | 1725783 | ≥ 16 | ≥ 16 | ≥ 16 | ≤ 16 | ≥ 16 | ≤ 64  | ≥ 4 | ≥4/76 |
| 82  | 1727646 | ≥ 16 | ≥ 16 | ≥ 16 | ≥ 64 | ≥ 16 | ≥ 256 | ≤ 1 | ≥4/76 |
| 83  | 1728409 | ≥ 16 | ≥ 16 | ≥ 16 | ≥ 64 | ≥ 16 | ≤ 64  | ≤ 1 | ≥4/76 |
| 84  | 1728979 | ≥ 16 | ≥ 16 | ≥ 16 | ≤ 16 | ≥ 16 | ≥ 256 | ≤ 1 | ≥4/76 |
| 85  | 1729216 | ≥ 16 | ≥ 16 | ≥ 16 | ≥ 64 | ≥ 16 | ≥ 256 | ≤ 1 | ≥4/76 |
| 86  | 1729494 | ≥ 16 | ≥ 16 | ≥ 16 | ≥ 64 | ≥ 16 | ≥ 256 | ≤ 1 | ≥4/76 |
| 87  | 1732456 | ≥ 16 | ≥ 16 | ≥ 16 | ≤ 16 | ≥ 16 | ≤ 64  | ≤ 1 | ≥4/76 |
| 88  | 1732972 | ≥ 16 | ≥ 16 | ≥ 16 | ≥ 64 | ≥ 16 | ≥ 256 | ≤ 1 | ≥4/76 |
| 89  | 1733175 | ≥ 16 | ≥ 16 | ≥ 16 | ≤ 16 | ≥ 16 | ≤ 64  | ≤ 1 | ≥4/76 |
| 90  | 1733558 | ≥ 16 | ≥ 16 | ≥ 16 | ≥ 64 | ≥ 16 | ≥ 256 | ≤ 1 | ≥4/76 |
| 91  | 1735030 | ≥ 16 | ≥ 16 | ≥ 16 | ≤ 16 | ≥ 16 | ≥ 256 | ≤ 1 | ≥4/76 |
| 92  | 1736316 | ≥ 16 | ≥ 16 | ≥ 16 | ≤ 16 | ≥ 16 | ≤ 64  | ≤ 1 | ≥4/76 |
| 93  | 1736478 | ≥ 16 | ≥ 16 | ≥ 16 | ≥ 64 | ≥ 16 | ≥ 256 | ≤ 1 | ≥4/76 |
| 94  | 1736545 | ≥ 16 | ≥ 16 | ≥ 16 | ≤ 16 | ≥ 16 | ≥ 256 | ≤ 1 | ≥4/76 |
| 95  | 1736849 | ≥ 16 | ≥ 16 | ≥ 16 | ≥ 64 | ≥ 16 | ≤ 64  | ≤ 1 | ≥4/76 |
| 96  | 1737908 | ≥ 16 | ≥ 16 | ≥ 16 | ≤ 16 | ≥ 16 | ≥ 256 | ≤ 1 | ≥4/76 |
| 97  | 1738572 | ≥ 16 | ≥ 16 | ≥ 16 | ≥ 64 | ≥ 16 | ≥ 256 | ≤ 1 | ≥4/76 |
| 98  | 1738637 | ≥ 16 | ≥ 16 | ≥ 16 | ≤ 16 | ≥ 16 | ≤ 64  | ≥ 4 | ≥4/76 |
| 99  | 1739659 | ≥ 16 | ≥ 16 | ≥ 16 | ≥ 64 | ≥ 16 | ≤ 64  | ≤ 1 | ≥4/76 |
| 100 | 1739709 | ≥ 16 | ≥ 16 | ≥ 16 | ≤ 16 | ≥ 16 | ≥ 256 | ≤ 1 | ≥4/76 |
| 101 | 1740093 | ≥ 16 | ≥ 16 | ≥ 16 | ≥ 64 | ≥ 16 | ≤ 64  | ≤ 1 | ≥4/76 |
| 102 | 1740266 | ≥ 16 | ≥ 16 | ≥ 16 | ≤ 16 | ≥ 16 | ≥ 256 | ≤ 1 | ≥4/76 |
| 103 | 1741070 | ≥ 16 | ≥ 16 | ≥ 16 | ≥ 64 | ≥ 16 | ≥ 256 | ≤ 1 | ≥4/76 |
| 104 | 1746779 | ≤ 4  | ≤ 2  | ≥ 16 | ≤ 16 | ≥ 16 | ≤ 64  | ≤ 1 | ≥4/76 |
| 105 | 1748811 | ≥ 16 | ≥ 16 | ≥ 16 | ≤ 16 | ≥ 16 | ≥ 256 | ≤ 1 | ≥4/76 |
| 106 | 1749608 | ≥ 16 | ≥ 16 | ≥ 16 | ≥ 64 | ≥ 16 | ≤ 64  | ≤ 1 | ≥4/76 |

|     |         |      |      |      |      |      |       |     |       |
|-----|---------|------|------|------|------|------|-------|-----|-------|
| 107 | 1749979 | ≥ 16 | ≥ 16 | ≥ 16 | ≤ 16 | ≤ 4  | ≥ 256 | ≤ 1 | ≥4/76 |
| 108 | 1750181 | ≥ 16 | ≥ 16 | ≥ 16 | ≥ 64 | ≥ 16 | ≤ 64  | ≤ 1 | ≥4/76 |
| 109 | 1750600 | ≥ 16 | ≥ 16 | ≥ 16 | ≤ 16 | ≤ 4  | ≥ 256 | ≤ 1 | ≥4/76 |
| 110 | 1750762 | ≥ 16 | ≥ 16 | ≥ 16 | ≥ 64 | ≥ 16 | ≥ 256 | ≤ 1 | ≥4/76 |
| 111 | 1751643 | ≥ 16 | ≥ 16 | ≥ 16 | ≥ 64 | ≥ 16 | ≤ 64  | ≤ 1 | ≥4/76 |
| 112 | 1752526 | ≥ 16 | ≥ 16 | ≥ 16 | ≤ 16 | ≥ 16 | ≤ 64  | ≤ 1 | ≥4/76 |
| 113 | 1753504 | ≥ 16 | ≥ 16 | ≥ 16 | ≥ 64 | ≥ 16 | ≥ 256 | ≤ 1 | ≥4/76 |
| 114 | 1753816 | ≥ 16 | ≥ 16 | ≥ 16 | ≤ 16 | ≥ 16 | ≤ 64  | ≥ 4 | ≥4/76 |
| 115 | 1755284 | ≥ 16 | ≥ 16 | ≥ 16 | ≤ 16 | ≥ 16 | ≤ 64  | ≤ 1 | ≥4/76 |
| 116 | 1755340 | ≥ 16 | ≥ 16 | ≥ 16 | ≥ 64 | ≥ 16 | ≥ 256 | ≤ 1 | ≥4/76 |
| 117 | 1756051 | ≥ 16 | ≥ 16 | ≥ 16 | ≤ 16 | ≥ 16 | ≥ 256 | ≤ 1 | ≥4/76 |
| 118 | 1756142 | ≥ 16 | ≥ 16 | ≥ 16 | ≥ 64 | ≥ 16 | ≤ 64  | ≤ 1 | ≥4/76 |
| 119 | 1757201 | ≥ 16 | ≥ 16 | ≥ 16 | ≤ 16 | ≥ 16 | ≥ 256 | ≤ 1 | ≥4/76 |
| 120 | 1757736 | ≥ 16 | ≥ 16 | ≥ 16 | ≤ 16 | ≥ 16 | ≥ 256 | ≤ 1 | ≥4/76 |
| 121 | 1758330 | ≥ 16 | ≥ 16 | ≥ 16 | ≥ 64 | ≥ 16 | ≤ 64  | ≤ 1 | ≥4/76 |
| 122 | 1758395 | ≥ 16 | ≥ 16 | ≥ 16 | ≤ 16 | ≥ 16 | ≤ 64  | ≤ 1 | ≥4/76 |
| 123 | 1758448 | ≥ 16 | ≥ 16 | ≥ 16 | ≥ 64 | ≥ 16 | ≥ 256 | ≤ 1 | ≥4/76 |
| 124 | 1759555 | ≥ 16 | ≥ 16 | ≥ 16 | ≥ 64 | ≥ 16 | ≥ 256 | ≤ 1 | ≥4/76 |
| 125 | 1759817 | ≥ 16 | ≤ 2  | ≥ 16 | ≤ 16 | ≥ 16 | ≤ 64  | ≤ 1 | ≥4/76 |
| 126 | 1760643 | ≥ 16 | ≥ 16 | ≥ 16 | ≥ 64 | ≥ 16 | ≥ 256 | ≥ 4 | ≥4/76 |
| 127 | 1761292 | ≥ 16 | ≥ 16 | ≥ 16 | ≤ 16 | ≥ 16 | ≥ 256 | ≤ 1 | ≥4/76 |
| 128 | 1761352 | ≥ 16 | ≥ 16 | ≥ 16 | ≥ 64 | ≥ 16 | ≤ 64  | ≤ 1 | ≥4/76 |
| 129 | 1762617 | ≥ 16 | ≥ 16 | ≥ 16 | ≤ 16 | ≥ 16 | ≥ 256 | ≤ 1 | ≥4/76 |
| 130 | 1762843 | ≥ 16 | ≥ 16 | ≥ 16 | ≥ 64 | ≥ 16 | ≥ 256 | ≤ 1 | ≥4/76 |
| 131 | 1763053 | ≥ 16 | ≥ 16 | ≥ 16 | ≤ 16 | ≥ 16 | ≤ 64  | ≤ 1 | ≥4/76 |
| 132 | 1763080 | ≥ 16 | ≥ 16 | ≥ 16 | ≥ 64 | ≥ 16 | ≥ 256 | ≤ 1 | ≥4/76 |
| 133 | 1765040 | ≥ 16 | ≥ 16 | ≥ 16 | ≥ 64 | ≥ 16 | ≤ 64  | ≤ 1 | ≥4/76 |
| 134 | 1765508 | ≥ 16 | ≥ 16 | ≥ 16 | ≤ 16 | ≥ 16 | ≤ 64  | ≤ 1 | ≥4/76 |
| 135 | 1765923 | ≥ 16 | ≥ 16 | ≥ 16 | ≥ 64 | ≥ 16 | ≥ 256 | ≤ 1 | ≥4/76 |
| 136 | 1766094 | ≥ 16 | ≥ 16 | ≥ 16 | ≤ 16 | ≥ 16 | ≥ 256 | ≤ 1 | ≥4/76 |
| 137 | 1766123 | ≥ 16 | ≥ 16 | ≥ 16 | ≥ 64 | ≥ 16 | ≤ 64  | ≤ 1 | ≥4/76 |
| 138 | 1766176 | ≥ 16 | ≥ 16 | ≥ 16 | ≤ 16 | ≥ 16 | ≥ 256 | ≤ 1 | ≥4/76 |
| 139 | 1766198 | ≥ 16 | ≥ 16 | ≥ 16 | ≤ 16 | ≥ 16 | ≥ 256 | ≥ 4 | ≥4/76 |
| 140 | 1766489 | ≥ 16 | ≥ 16 | ≥ 16 | ≤ 16 | ≥ 16 | ≤ 64  | ≤ 1 | ≥4/76 |
| 141 | 1767244 | ≥ 16 | ≥ 16 | ≥ 16 | ≥ 64 | ≥ 16 | ≤ 64  | ≤ 1 | ≥4/76 |
| 142 | 1767348 | ≥ 16 | ≥ 16 | ≥ 16 | ≤ 16 | ≤ 4  | ≥ 256 | ≤ 1 | ≥4/76 |
| 143 | 1768100 | ≥ 16 | ≥ 16 | ≥ 16 | ≥ 64 | ≥ 16 | ≤ 64  | ≤ 1 | ≥4/76 |
| 144 | 1769562 | ≥ 16 | ≥ 16 | ≥ 16 | ≤ 16 | ≤ 4  | ≥ 256 | ≤ 1 | ≥4/76 |
| 145 | 1769847 | ≥ 16 | ≥ 16 | ≥ 16 | ≥ 64 | ≥ 16 | ≥ 256 | ≤ 1 | ≥4/76 |
| 146 | 1770111 | ≥ 16 | ≥ 16 | ≥ 16 | ≥ 64 | ≥ 16 | ≤ 64  | ≤ 1 | ≥4/76 |
| 147 | 1770177 | ≥ 16 | ≥ 16 | ≥ 16 | ≤ 16 | ≥ 16 | ≥ 256 | ≤ 1 | ≥4/76 |
| 148 | 1770730 | ≥ 16 | ≥ 16 | ≥ 16 | ≥ 64 | ≥ 16 | ≥ 256 | ≤ 1 | ≥4/76 |
| 149 | 1771549 | ≥ 16 | ≥ 16 | ≥ 16 | ≤ 16 | ≥ 16 | ≤ 64  | ≤ 1 | ≥4/76 |
| 150 | 1772176 | ≥ 16 | ≥ 16 | ≥ 16 | ≤ 16 | ≥ 16 | ≥ 256 | ≤ 1 | ≥4/76 |
| 151 | 1772963 | ≥ 16 | ≥ 16 | ≥ 16 | ≥ 64 | ≥ 16 | ≤ 64  | ≤ 1 | ≥4/76 |
| 152 | 1773213 | ≥ 16 | ≥ 16 | ≥ 16 | ≥ 64 | ≥ 16 | ≥ 256 | ≥ 4 | ≥4/76 |
| 153 | 1773735 | ≥ 16 | ≥ 16 | ≥ 16 | ≥ 64 | ≥ 16 | ≤ 64  | ≤ 1 | ≥4/76 |
| 154 | 1774722 | ≥ 16 | ≥ 16 | ≥ 16 | ≤ 16 | ≤ 4  | ≥ 256 | ≤ 1 | ≥4/76 |
| 155 | 1775047 | ≥ 16 | ≥ 16 | ≥ 16 | ≥ 64 | ≤ 4  | ≤ 64  | ≤ 1 | ≥4/76 |
| 156 | 1775557 | ≥ 16 | ≥ 16 | ≥ 16 | ≤ 16 | ≤ 4  | ≥ 256 | ≤ 1 | ≥4/76 |
| 157 | 1775768 | ≥ 16 | ≥ 16 | ≥ 16 | ≥ 64 | ≥ 16 | ≥ 256 | ≤ 1 | ≥4/76 |
| 158 | 1776183 | ≥ 16 | ≥ 16 | ≥ 16 | ≥ 64 | ≥ 16 | ≥ 256 | ≤ 1 | ≥4/76 |
| 159 | 1776245 | ≥ 16 | ≥ 16 | ≥ 16 | ≤ 16 | ≤ 4  | ≥ 256 | ≤ 1 | ≥4/76 |
| 160 | 1776929 | ≥ 16 | ≥ 16 | ≥ 16 | ≥ 64 | ≥ 16 | ≤ 64  | ≤ 1 | ≥4/76 |

|     |         |      |      |      |      |      |       |     |       |
|-----|---------|------|------|------|------|------|-------|-----|-------|
| 161 | 1777669 | ≥ 16 | ≥ 16 | ≥ 16 | ≥ 64 | ≥ 16 | ≥ 256 | ≤ 1 | ≥4/76 |
| 162 | 1778511 | ≥ 16 | ≥ 16 | ≥ 16 | ≤ 16 | ≥ 16 | ≥ 256 | ≤ 1 | ≥4/76 |
| 163 | 1779476 | ≥ 16 | ≥ 16 | ≥ 16 | ≤ 16 | ≤ 4  | ≤ 64  | ≤ 1 | ≥4/76 |
| 164 | 1779744 | ≥ 16 | ≥ 16 | ≥ 16 | ≥ 64 | ≥ 16 | ≥ 256 | ≤ 1 | ≥4/76 |
| 165 | 1780136 | ≥ 16 | ≥ 16 | ≥ 16 | ≥ 64 | ≥ 16 | ≥ 256 | ≤ 1 | ≥4/76 |
| 166 | 1780855 | ≥ 16 | ≥ 16 | ≥ 16 | ≤ 16 | ≥ 16 | ≥ 256 | ≤ 1 | ≥4/76 |
| 167 | 1781129 | ≥ 16 | ≥ 16 | ≥ 16 | ≥ 64 | ≥ 16 | ≥ 256 | ≤ 1 | ≥4/76 |
| 168 | 1782896 | ≥ 16 | ≥ 16 | ≥ 16 | ≥ 64 | ≥ 16 | ≥ 256 | ≤ 1 | ≥4/76 |
| 169 | 1783150 | ≥ 16 | ≥ 16 | ≥ 16 | ≤ 16 | ≤ 4  | ≥ 256 | ≤ 1 | ≥4/76 |
| 170 | 1785644 | ≥ 16 | ≥ 16 | ≥ 16 | ≥ 64 | ≥ 16 | ≥ 256 | ≤ 1 | ≥4/76 |
| 171 | 1786611 | ≥ 16 | ≥ 16 | ≥ 16 | ≤ 16 | ≥ 16 | ≥ 256 | ≤ 1 | ≥4/76 |
| 172 | 1786730 | ≥ 16 | ≥ 16 | ≥ 16 | ≥ 64 | ≥ 16 | ≥ 256 | ≤ 1 | ≥4/76 |
| 173 | 1787863 | ≥ 16 | ≥ 16 | ≥ 16 | ≥ 64 | ≥ 16 | ≥ 256 | ≤ 1 | ≥4/76 |
| 174 | 1788964 | ≥ 16 | ≥ 16 | ≥ 16 | ≥ 64 | ≥ 16 | ≥ 256 | ≤ 1 | ≥4/76 |
| 175 | 1789110 | ≥ 16 | ≥ 16 | ≥ 16 | ≤ 16 | ≤ 4  | ≤ 64  | ≤ 1 | ≥4/76 |
| 176 | 1789592 | ≥ 16 | ≥ 16 | ≥ 16 | ≥ 64 | ≥ 16 | ≥ 256 | ≤ 1 | ≥4/76 |
| 177 | 1789827 | ≥ 16 | ≥ 16 | ≥ 16 | ≤ 16 | ≤ 4  | ≤ 64  | ≤ 1 | ≥4/76 |
| 178 | 1789833 | ≥ 16 | ≥ 16 | ≥ 16 | ≥ 64 | ≥ 16 | ≥ 256 | ≤ 1 | ≥4/76 |
| 179 | 1790155 | ≥ 16 | ≥ 16 | ≥ 16 | ≤ 16 | ≤ 4  | ≥ 256 | ≤ 1 | ≥4/76 |
| 180 | 1793330 | ≥ 16 | ≥ 16 | ≥ 16 | ≥ 64 | ≥ 16 | ≥ 256 | ≤ 1 | ≥4/76 |
| 181 | 1795261 | ≥ 16 | ≥ 16 | ≥ 16 | ≥ 64 | ≥ 16 | ≥ 256 | ≤ 1 | ≥4/76 |
| 182 | 1796385 | ≥ 16 | ≥ 16 | ≥ 16 | ≥ 64 | ≥ 16 | ≥ 256 | ≤ 1 | ≥4/76 |
| 183 | 1796449 | ≥ 16 | ≥ 16 | ≥ 16 | ≤ 16 | ≥ 16 | ≥ 256 | ≤ 1 | ≥4/76 |
| 184 | 1798073 | ≥ 16 | ≥ 16 | ≥ 16 | ≥ 64 | ≥ 16 | ≤ 64  | ≤ 1 | ≥4/76 |
| 185 | 1798991 | ≥ 16 | ≥ 16 | ≥ 16 | ≥ 64 | ≥ 16 | ≥ 256 | ≤ 1 | ≥4/76 |
| 186 | 1800441 | ≥ 16 | ≥ 16 | ≥ 16 | ≤ 16 | ≤ 4  | ≥ 256 | ≤ 1 | ≥4/76 |
| 187 | 1800637 | ≥ 16 | ≥ 16 | ≥ 16 | ≥ 64 | ≥ 16 | ≤ 64  | ≤ 1 | ≥4/76 |
| 188 | 1802164 | ≥ 16 | ≥ 16 | ≥ 16 | ≤ 16 | ≥ 16 | ≥ 256 | ≤ 1 | ≥4/76 |
| 189 | 1802353 | ≥ 16 | ≥ 16 | ≥ 16 | ≥ 64 | ≥ 16 | ≤ 64  | ≤ 1 | ≥4/76 |
| 190 | 1803598 | ≥ 16 | ≥ 16 | ≥ 16 | ≤ 16 | ≤ 4  | ≥ 256 | ≤ 1 | ≥4/76 |
| 191 | 1807531 | ≥ 16 | ≥ 16 | ≥ 16 | ≤ 16 | ≥ 16 | ≤ 64  | ≤ 1 | ≥4/76 |
| 192 | 1809155 | ≥ 16 | ≥ 16 | ≥ 16 | ≥ 64 | ≥ 16 | ≥ 256 | ≤ 1 | ≥4/76 |
| 193 | 1809300 | ≥ 16 | ≥ 16 | ≥ 16 | ≤ 16 | ≤ 4  | ≥ 256 | ≤ 1 | ≥4/76 |
| 194 | 1809481 | ≥ 16 | ≥ 16 | ≥ 16 | ≥ 64 | ≥ 16 | ≤ 64  | ≤ 1 | ≥4/76 |
| 195 | 1811703 | ≥ 16 | ≥ 16 | ≥ 16 | ≤ 16 | ≤ 4  | ≥ 256 | ≤ 1 | ≥4/76 |
| 196 | 1812416 | ≥ 16 | ≥ 16 | ≥ 16 | ≥ 64 | ≥ 16 | ≤ 64  | ≤ 1 | ≥4/76 |
| 197 | 1812894 | ≥ 16 | ≥ 16 | ≥ 16 | ≤ 16 | ≤ 4  | ≤ 64  | ≤ 1 | ≥4/76 |
| 198 | 1813076 | ≥ 16 | ≥ 16 | ≥ 16 | ≥ 64 | ≥ 16 | ≥ 256 | ≤ 1 | ≥4/76 |
| 199 | 1815884 | ≥ 16 | ≥ 16 | ≥ 16 | ≥ 64 | ≥ 16 | ≥ 256 | ≤ 1 | ≥4/76 |
| 200 | 1816127 | ≥ 16 | ≥ 16 | ≥ 16 | ≥ 64 | ≥ 16 | ≥ 256 | ≤ 1 | ≥4/76 |
| 201 | 1817365 | ≥ 16 | ≥ 16 | ≥ 16 | ≥ 64 | ≥ 16 | ≥ 256 | ≤ 1 | ≥4/76 |
| 202 | 1819146 | ≥ 16 | ≥ 16 | ≥ 16 | ≥ 64 | ≥ 16 | ≤ 64  | ≤ 1 | ≥4/76 |
| 203 | 1819758 | ≥ 16 | ≥ 16 | ≥ 16 | ≤ 16 | ≤ 4  | ≥ 256 | ≤ 1 | ≥4/76 |
| 204 | 1820477 | ≥ 16 | ≥ 16 | ≥ 16 | ≥ 64 | ≥ 16 | ≤ 64  | ≤ 1 | ≥4/76 |
| 205 | 1821991 | ≥ 16 | ≥ 16 | ≥ 16 | ≤ 16 | ≤ 4  | ≤ 64  | ≤ 1 | ≥4/76 |
| 206 | 1822057 | ≥ 16 | ≥ 16 | ≥ 16 | ≥ 64 | ≥ 16 | ≥ 256 | ≤ 1 | ≥4/76 |
| 207 | 1822430 | ≥ 16 | ≥ 16 | ≥ 16 | ≥ 64 | ≥ 16 | ≤ 64  | ≤ 1 | ≥4/76 |
| 208 | 1822599 | ≥ 16 | ≥ 16 | ≥ 16 | ≥ 64 | ≥ 16 | ≥ 256 | ≤ 1 | ≥4/76 |
| 209 | 1823146 | ≥ 16 | ≥ 16 | ≥ 16 | ≤ 16 | ≤ 4  | ≤ 64  | ≤ 1 | ≥4/76 |
| 210 | 1824014 | ≥ 16 | ≥ 16 | ≥ 16 | ≤ 16 | ≤ 4  | ≥ 256 | ≤ 1 | ≥4/76 |
| 211 | 1824858 | ≥ 16 | ≥ 16 | ≥ 16 | ≥ 64 | ≥ 16 | ≥ 256 | ≤ 1 | ≥4/76 |
| 212 | 1825262 | ≥ 16 | ≥ 16 | ≥ 16 | ≥ 64 | ≥ 16 | ≥ 256 | ≤ 1 | ≥4/76 |
| 213 | 1825889 | ≥ 16 | ≥ 16 | ≥ 16 | ≤ 16 | ≤ 4  | ≤ 64  | ≤ 1 | ≥4/76 |
| 214 | 1826017 | ≥ 16 | ≥ 16 | ≥ 16 | ≥ 64 | ≥ 16 | ≥ 256 | ≤ 1 | ≥4/76 |



|     |         |      |      |      |      |      |       |     |       |
|-----|---------|------|------|------|------|------|-------|-----|-------|
| 215 | 1826067 | ≥ 16 | ≥ 16 | ≥ 16 | ≥ 64 | ≥ 16 | ≥ 256 | ≤ 1 | ≥4/76 |
| 216 | 1826174 | ≥ 16 | ≥ 16 | ≥ 16 | ≤ 16 | ≤ 4  | ≤ 64  | ≤ 1 | ≥4/76 |
| 217 | 1826332 | ≥ 16 | ≥ 16 | ≥ 16 | ≥ 64 | ≥ 16 | ≥ 256 | ≤ 1 | ≥4/76 |
| 218 | 1826389 | ≥ 16 | ≥ 16 | ≥ 16 | ≥ 64 | ≥ 16 | ≤ 64  | ≤ 1 | ≥4/76 |
| 219 | 1826466 | ≥ 16 | ≥ 16 | ≥ 16 | ≥ 64 | ≥ 16 | ≥ 256 | ≤ 1 | ≥4/76 |
| 220 | 1826503 | ≥ 16 | ≥ 16 | ≥ 16 | ≥ 64 | ≥ 16 | ≥ 256 | ≤ 1 | ≥4/76 |
| 221 | 1826507 | ≥ 16 | ≥ 16 | ≥ 16 | ≥ 64 | ≥ 16 | ≥ 256 | ≤ 1 | ≥4/76 |
| 222 | 1826858 | ≥ 16 | ≥ 16 | ≥ 16 | ≥ 64 | ≥ 16 | ≤ 64  | ≤ 1 | ≥4/76 |
| 223 | 1827255 | ≥ 16 | ≥ 16 | ≥ 16 | ≥ 64 | ≥ 16 | ≥ 256 | ≤ 1 | ≥4/76 |
| 224 | 1827473 | ≥ 16 | ≥ 16 | ≥ 16 | ≥ 64 | ≥ 16 | ≥ 256 | ≤ 1 | ≥4/76 |
| 225 | 1827500 | ≥ 16 | ≥ 16 | ≥ 16 | ≥ 64 | ≥ 16 | ≤ 64  | ≤ 1 | ≥4/76 |
| 226 | 1828232 | ≥ 16 | ≥ 16 | ≥ 16 | ≥ 64 | ≥ 16 | ≥ 256 | ≤ 1 | ≥4/76 |
| 227 | 1829427 | ≥ 16 | ≥ 16 | ≥ 16 | ≥ 64 | ≥ 16 | ≤ 64  | ≤ 1 | ≥4/76 |
| 228 | 1829496 | ≥ 16 | ≥ 16 | ≥ 16 | ≥ 64 | ≥ 16 | ≥ 256 | ≤ 1 | ≥4/76 |
| 229 | 1829525 | ≥ 16 | ≥ 16 | ≥ 16 | ≥ 64 | ≥ 16 | ≤ 64  | ≤ 1 | ≥4/76 |
| 230 | 1830110 | ≥ 16 | ≥ 16 | ≥ 16 | ≥ 64 | ≥ 16 | ≥ 256 | ≤ 1 | ≥4/76 |
| 231 | 1831141 | ≥ 16 | ≥ 16 | ≥ 16 | ≥ 64 | ≥ 16 | ≤ 64  | ≤ 1 | ≥4/76 |
| 232 | 1832787 | ≥ 16 | ≥ 16 | ≥ 16 | ≥ 64 | ≥ 16 | ≥ 256 | ≤ 1 | ≥4/76 |
| 233 | 1833087 | ≥ 16 | ≥ 16 | ≥ 16 | ≥ 64 | ≥ 16 | ≤ 64  | ≤ 1 | ≥4/76 |
| 234 | 1833255 | ≥ 16 | ≥ 16 | ≥ 16 | ≥ 64 | ≥ 16 | ≤ 64  | ≤ 1 | ≥4/76 |
| 235 | 1833931 | ≥ 16 | ≥ 16 | ≥ 16 | ≥ 64 | ≥ 16 | ≥ 256 | ≤ 1 | ≥4/76 |
| 236 | 1834695 | ≥ 16 | ≥ 16 | ≥ 16 | ≥ 64 | ≥ 16 | ≥ 256 | ≤ 1 | ≥4/76 |
| 237 | 1836111 | ≥ 16 | ≥ 16 | ≥ 16 | ≥ 64 | ≥ 16 | ≤ 64  | ≤ 1 | ≥4/76 |
| 238 | 1836927 | ≥ 16 | ≥ 16 | ≥ 16 | ≥ 64 | ≥ 16 | ≥ 256 | ≤ 1 | ≥4/76 |
| 239 | 1837981 | ≥ 16 | ≥ 16 | ≥ 16 | ≥ 64 | ≥ 16 | ≥ 256 | ≤ 1 | ≥4/76 |
| 240 | 1839209 | ≥ 16 | ≥ 16 | ≥ 16 | ≥ 64 | ≥ 16 | ≥ 256 | ≤ 1 | ≥4/76 |
| 241 | 1843688 | ≥ 16 | ≥ 16 | ≥ 16 | ≥ 64 | ≥ 16 | ≤ 64  | ≤ 1 | ≥4/76 |
| 242 | 1844885 | ≥ 16 | ≥ 16 | ≥ 16 | ≥ 64 | ≥ 16 | ≥ 256 | ≤ 1 | ≥4/76 |
| 243 | 1848366 | ≥ 16 | ≥ 16 | ≥ 16 | ≥ 64 | ≥ 16 | ≥ 256 | ≤ 1 | ≥4/76 |
| 244 | 1848507 | ≥ 16 | ≥ 16 | ≥ 16 | ≥ 64 | ≥ 16 | ≤ 64  | ≤ 1 | ≥4/76 |

Table4

| Number | Patients ID | Ertapenem | Imipenem | Meropenem |
|--------|-------------|-----------|----------|-----------|
| 1      | 1211008     | ≥ 2       | ≥ 4      | ≥ 4       |
| 2      | 1255707     | ≥ 2       | ≥ 4      | ≥ 4       |
| 3      | 1387145     | ≥ 2       | ≥ 4      | ≥ 4       |
| 4      | 1435940     | ≥ 2       | ≥ 4      | ≥ 4       |
| 5      | 1457348     | ≥ 2       | ≥ 4      | ≥ 4       |
| 6      | 1467859     | ≥ 2       | ≥ 4      | ≤ 2       |
| 7      | 1603858     | ≥ 2       | ≥ 4      | ≥ 4       |
| 8      | 1628916     | ≥ 2       | ≥ 4      | ≥ 4       |
| 9      | 1631286     | ≥ 2       | ≥ 4      | ≥ 4       |
| 10     | 1643835     | ≥ 2       | ≥ 4      | ≥ 4       |
| 11     | 1654306     | ≥ 2       | ≥ 4      | ≥ 4       |
| 12     | 1655141     | ≥ 2       | ≥ 4      | ≥ 4       |
| 13     | 1673544     | ≥ 2       | ≥ 4      | ≥ 4       |
| 14     | 1674016     | ≥ 2       | ≥ 4      | ≥ 4       |
| 15     | 1676693     | ≥ 2       | ≥ 4      | ≥ 4       |
| 16     | 1676967     | ≥ 2       | ≥ 4      | ≥ 4       |
| 17     | 1677363     | ≥ 2       | ≥ 4      | ≥ 4       |
| 18     | 1677521     | ≥ 2       | ≥ 4      | ≥ 4       |
| 19     | 1678002     | ≥ 2       | ≥ 4      | ≥ 4       |
| 20     | 1678087     | ≥ 2       | ≥ 4      | ≥ 4       |
| 21     | 1678329     | ≥ 2       | ≥ 4      | ≥ 4       |
| 22     | 1679510     | ≥ 2       | ≥ 4      | ≥ 4       |
| 23     | 1681169     | ≥ 2       | ≥ 4      | ≥ 4       |
| 24     | 1681287     | ≥ 2       | ≥ 4      | ≥ 4       |
| 25     | 1681407     | ≥ 2       | ≥ 4      | ≥ 4       |
| 26     | 1681610     | ≥ 2       | ≥ 4      | ≥ 4       |
| 27     | 1683217     | ≥ 2       | ≥ 4      | ≥ 4       |
| 28     | 1683428     | ≥ 2       | ≥ 4      | ≥ 4       |
| 29     | 1683853     | ≥ 2       | ≥ 4      | ≥ 4       |
| 30     | 1683893     | ≥ 2       | ≥ 4      | ≥ 4       |
| 31     | 1684044     | ≥ 2       | ≥ 4      | ≥ 4       |
| 32     | 1684190     | ≥ 2       | ≥ 4      | ≥ 4       |
| 33     | 1684510     | ≥ 2       | ≥ 4      | ≥ 4       |
| 34     | 1684821     | ≥ 2       | ≥ 4      | ≥ 4       |
| 35     | 1685440     | ≥ 2       | ≥ 4      | ≥ 4       |
| 36     | 1687366     | ≥ 2       | ≥ 4      | ≥ 4       |
| 37     | 1688971     | ≥ 2       | ≥ 4      | ≥ 4       |
| 38     | 1689120     | ≥ 2       | ≥ 4      | ≥ 4       |
| 39     | 1689894     | ≥ 2       | ≥ 4      | ≥ 4       |
| 40     | 1690370     | ≥ 2       | ≥ 4      | ≥ 4       |
| 41     | 1691389     | ≥ 2       | ≥ 4      | ≥ 4       |
| 42     | 1692011     | ≥ 2       | ≥ 4      | ≥ 4       |
| 43     | 1695674     | ≥ 2       | ≥ 4      | ≥ 4       |
| 44     | 1696129     | ≥ 2       | ≥ 4      | ≥ 4       |
| 45     | 1696670     | ≥ 2       | ≥ 4      | ≤ 2       |
| 46     | 1698113     | ≥ 2       | ≥ 4      | ≥ 4       |
| 47     | 1700328     | ≥ 2       | ≥ 4      | ≥ 4       |
| 48     | 1700934     | ≥ 2       | ≥ 4      | ≥ 4       |
| 49     | 1702475     | ≥ 2       | ≥ 4      | ≥ 4       |
| 50     | 1703413     | ≥ 2       | ≥ 4      | ≥ 4       |
| 51     | 1704192     | ≥ 2       | ≥ 4      | ≥ 4       |
| 52     | 1706017     | ≥ 2       | ≥ 4      | ≥ 4       |

|     |         |     |     |     |
|-----|---------|-----|-----|-----|
| 53  | 1707501 | ≥ 2 | ≥ 4 | ≥ 4 |
| 54  | 1707627 | ≥ 2 | ≥ 4 | ≥ 4 |
| 55  | 1710844 | ≥ 2 | ≥ 4 | ≥ 4 |
| 56  | 1711345 | ≥ 2 | ≥ 4 | ≥ 4 |
| 57  | 1711559 | ≥ 2 | ≥ 4 | ≥ 4 |
| 58  | 1711905 | ≥ 2 | ≥ 4 | ≥ 4 |
| 59  | 1712856 | ≥ 2 | ≥ 4 | ≥ 4 |
| 60  | 1713261 | ≥ 2 | ≥ 4 | ≥ 4 |
| 61  | 1713952 | ≥ 2 | ≥ 4 | ≥ 4 |
| 62  | 1714960 | ≥ 2 | ≥ 4 | ≥ 4 |
| 63  | 1715473 | ≥ 2 | ≥ 4 | ≥ 4 |
| 64  | 1716196 | ≥ 2 | ≥ 4 | ≥ 4 |
| 65  | 1717117 | ≥ 2 | ≥ 4 | ≥ 4 |
| 66  | 1717330 | ≥ 2 | ≥ 4 | ≥ 4 |
| 67  | 1718209 | ≥ 2 | ≥ 4 | ≥ 4 |
| 68  | 1718292 | ≥ 2 | ≥ 4 | ≥ 4 |
| 69  | 1718861 | ≥ 2 | ≥ 4 | ≥ 4 |
| 70  | 1719002 | ≥ 2 | ≥ 4 | ≥ 4 |
| 71  | 1719585 | ≥ 2 | ≥ 4 | ≥ 4 |
| 72  | 1720545 | ≥ 2 | ≥ 4 | ≥ 4 |
| 73  | 1722263 | ≥ 2 | ≥ 4 | ≥ 4 |
| 74  | 1722520 | ≥ 2 | ≥ 4 | ≥ 4 |
| 75  | 1722588 | ≥ 2 | ≥ 4 | ≥ 4 |
| 76  | 1722653 | ≥ 2 | ≥ 4 | ≥ 4 |
| 77  | 1722820 | ≥ 2 | ≥ 4 | ≥ 4 |
| 78  | 1723040 | ≥ 2 | ≥ 4 | ≥ 4 |
| 79  | 1724993 | ≥ 2 | ≥ 4 | ≥ 4 |
| 80  | 1725517 | ≥ 2 | ≥ 4 | ≥ 4 |
| 81  | 1725783 | ≥ 2 | ≥ 4 | ≥ 4 |
| 82  | 1727646 | ≥ 2 | ≥ 4 | ≥ 4 |
| 83  | 1728409 | ≥ 2 | ≥ 4 | ≥ 4 |
| 84  | 1728979 | ≥ 2 | ≥ 4 | ≥ 4 |
| 85  | 1729216 | ≥ 2 | ≥ 4 | ≥ 4 |
| 86  | 1729494 | ≥ 2 | ≥ 4 | ≥ 4 |
| 87  | 1732456 | ≥ 2 | ≥ 4 | ≥ 4 |
| 88  | 1732972 | ≥ 2 | ≥ 4 | ≥ 4 |
| 89  | 1733175 | ≥ 2 | ≥ 4 | ≥ 4 |
| 90  | 1733558 | ≥ 2 | ≥ 4 | ≥ 4 |
| 91  | 1735030 | ≥ 2 | ≥ 4 | ≥ 4 |
| 92  | 1736316 | ≥ 2 | ≥ 4 | ≥ 4 |
| 93  | 1736478 | ≥ 2 | ≥ 4 | ≥ 4 |
| 94  | 1736545 | ≥ 2 | ≥ 4 | ≥ 4 |
| 95  | 1736849 | ≥ 2 | ≥ 4 | ≥ 4 |
| 96  | 1737908 | ≥ 2 | ≥ 4 | ≥ 4 |
| 97  | 1738572 | ≥ 2 | ≥ 4 | ≥ 4 |
| 98  | 1738637 | ≥ 2 | ≥ 4 | ≤ 2 |
| 99  | 1739659 | ≥ 2 | ≥ 4 | ≥ 4 |
| 100 | 1739709 | ≥ 2 | ≥ 4 | ≥ 4 |
| 101 | 1740093 | ≥ 2 | ≥ 4 | ≥ 4 |
| 102 | 1740266 | ≥ 2 | ≥ 4 | ≥ 4 |
| 103 | 1741070 | ≥ 2 | ≥ 4 | ≥ 4 |
| 104 | 1746779 | ≥ 2 | ≥ 4 | ≥ 4 |
| 105 | 1748811 | ≥ 2 | ≥ 4 | ≥ 4 |
| 106 | 1749608 | ≥ 2 | ≥ 4 | ≥ 4 |

|     |         |     |     |     |
|-----|---------|-----|-----|-----|
| 107 | 1749979 | ≥ 2 | ≥ 4 | ≥ 4 |
| 108 | 1750181 | ≥ 2 | ≥ 4 | ≥ 4 |
| 109 | 1750600 | ≥ 2 | ≥ 4 | ≥ 4 |
| 110 | 1750762 | ≥ 2 | ≥ 4 | ≥ 4 |
| 111 | 1751643 | ≥ 2 | ≥ 4 | ≥ 4 |
| 112 | 1752526 | ≥ 2 | ≥ 4 | ≥ 4 |
| 113 | 1753504 | ≥ 2 | ≥ 4 | ≥ 4 |
| 114 | 1753816 | ≥ 2 | ≥ 4 | ≥ 4 |
| 115 | 1755284 | ≥ 2 | ≥ 4 | ≥ 4 |
| 116 | 1755340 | ≥ 2 | ≥ 4 | ≥ 4 |
| 117 | 1756051 | ≥ 2 | ≥ 4 | ≥ 4 |
| 118 | 1756142 | ≥ 2 | ≥ 4 | ≥ 4 |
| 119 | 1757201 | ≥ 2 | ≥ 4 | ≥ 4 |
| 120 | 1757736 | ≥ 2 | ≥ 4 | ≥ 4 |
| 121 | 1758330 | ≥ 2 | ≥ 4 | ≥ 4 |
| 122 | 1758395 | ≥ 2 | ≥ 4 | ≥ 4 |
| 123 | 1758448 | ≥ 2 | ≥ 4 | ≥ 4 |
| 124 | 1759555 | ≥ 2 | ≥ 4 | ≥ 4 |
| 125 | 1759817 | ≥ 2 | ≥ 4 | ≥ 4 |
| 126 | 1760643 | ≥ 2 | ≥ 4 | ≥ 4 |
| 127 | 1761292 | ≥ 2 | ≥ 4 | ≥ 4 |
| 128 | 1761352 | ≥ 2 | ≥ 4 | ≥ 4 |
| 129 | 1762617 | ≥ 2 | ≥ 4 | ≥ 4 |
| 130 | 1762843 | ≥ 2 | ≥ 4 | ≥ 4 |
| 131 | 1763053 | ≥ 2 | ≥ 4 | ≥ 4 |
| 132 | 1763080 | ≥ 2 | ≥ 4 | ≥ 4 |
| 133 | 1765040 | ≥ 2 | ≥ 4 | ≥ 4 |
| 134 | 1765508 | ≥ 2 | ≥ 4 | ≥ 4 |
| 135 | 1765923 | ≥ 2 | ≥ 4 | ≥ 4 |
| 136 | 1766094 | ≥ 2 | ≥ 4 | ≥ 4 |
| 137 | 1766123 | ≥ 2 | ≥ 4 | ≥ 4 |
| 138 | 1766176 | ≥ 2 | ≥ 4 | ≥ 4 |
| 139 | 1766198 | ≥ 2 | ≥ 4 | ≥ 4 |
| 140 | 1766489 | ≥ 2 | ≥ 4 | ≥ 4 |
| 141 | 1767244 | ≥ 2 | ≥ 4 | ≥ 4 |
| 142 | 1767348 | ≥ 2 | ≥ 4 | ≥ 4 |
| 143 | 1768100 | ≥ 2 | ≥ 4 | ≥ 4 |
| 144 | 1769562 | ≥ 2 | ≥ 4 | ≥ 4 |
| 145 | 1769847 | ≥ 2 | ≥ 4 | ≥ 4 |
| 146 | 1770111 | ≥ 2 | ≥ 4 | ≥ 4 |
| 147 | 1770177 | ≥ 2 | ≥ 4 | ≥ 4 |
| 148 | 1770730 | ≥ 2 | ≥ 4 | ≥ 4 |
| 149 | 1771549 | ≥ 2 | ≥ 4 | ≥ 4 |
| 150 | 1772176 | ≥ 2 | ≥ 4 | ≥ 4 |
| 151 | 1772963 | ≥ 2 | ≥ 4 | ≥ 4 |
| 152 | 1773213 | ≥ 2 | ≥ 4 | ≥ 4 |
| 153 | 1773735 | ≥ 2 | ≥ 4 | ≥ 4 |
| 154 | 1774722 | ≥ 2 | ≥ 4 | ≥ 4 |
| 155 | 1775047 | ≥ 2 | ≥ 4 | ≥ 4 |
| 156 | 1775557 | ≥ 2 | ≥ 4 | ≥ 4 |
| 157 | 1775768 | ≥ 2 | ≥ 4 | ≥ 4 |
| 158 | 1776183 | ≥ 2 | ≥ 4 | ≥ 4 |
| 159 | 1776245 | ≥ 2 | ≥ 4 | ≥ 4 |
| 160 | 1776929 | ≥ 2 | ≥ 4 | ≥ 4 |

|     |         |     |     |     |
|-----|---------|-----|-----|-----|
| 161 | 1777669 | ≥ 2 | ≥ 4 | ≥ 4 |
| 162 | 1778511 | ≥ 2 | ≥ 4 | ≥ 4 |
| 163 | 1779476 | ≥ 2 | ≥ 4 | ≥ 4 |
| 164 | 1779744 | ≥ 2 | ≥ 4 | ≥ 4 |
| 165 | 1780136 | ≥ 2 | ≥ 4 | ≥ 4 |
| 166 | 1780855 | ≥ 2 | ≥ 4 | ≥ 4 |
| 167 | 1781129 | ≥ 2 | ≥ 4 | ≥ 4 |
| 168 | 1782896 | ≥ 2 | ≥ 4 | ≥ 4 |
| 169 | 1783150 | ≥ 2 | ≥ 4 | ≥ 4 |
| 170 | 1785644 | ≥ 2 | ≥ 4 | ≥ 4 |
| 171 | 1786611 | ≥ 2 | ≥ 4 | ≥ 4 |
| 172 | 1786730 | ≥ 2 | ≥ 4 | ≥ 4 |
| 173 | 1787863 | ≥ 2 | ≥ 4 | ≥ 4 |
| 174 | 1788964 | ≥ 2 | ≥ 4 | ≥ 4 |
| 175 | 1789110 | ≥ 2 | ≥ 4 | ≥ 4 |
| 176 | 1789592 | ≥ 2 | ≥ 4 | ≥ 4 |
| 177 | 1789827 | ≥ 2 | ≥ 4 | ≥ 4 |
| 178 | 1789833 | ≥ 2 | ≥ 4 | ≥ 4 |
| 179 | 1790155 | ≥ 2 | ≥ 4 | ≥ 4 |
| 180 | 1793330 | ≥ 2 | ≥ 4 | ≥ 4 |
| 181 | 1795261 | ≥ 2 | ≥ 4 | ≥ 4 |
| 182 | 1796385 | ≥ 2 | ≥ 4 | ≥ 4 |
| 183 | 1796449 | ≥ 2 | ≥ 4 | ≥ 4 |
| 184 | 1798073 | ≥ 2 | ≥ 4 | ≥ 4 |
| 185 | 1798991 | ≥ 2 | ≥ 4 | ≥ 4 |
| 186 | 1800441 | ≥ 2 | ≥ 4 | ≥ 4 |
| 187 | 1800637 | ≥ 2 | ≥ 4 | ≥ 4 |
| 188 | 1802164 | ≥ 2 | ≥ 4 | ≥ 4 |
| 189 | 1802353 | ≥ 2 | ≥ 4 | ≥ 4 |
| 190 | 1803598 | ≥ 2 | ≥ 4 | ≥ 4 |
| 191 | 1807531 | ≥ 2 | ≥ 4 | ≥ 4 |
| 192 | 1809155 | ≥ 2 | ≥ 4 | ≥ 4 |
| 193 | 1809300 | ≥ 2 | ≥ 4 | ≥ 4 |
| 194 | 1809481 | ≥ 2 | ≥ 4 | ≥ 4 |
| 195 | 1811703 | ≥ 2 | ≥ 4 | ≥ 4 |
| 196 | 1812416 | ≥ 2 | ≥ 4 | ≥ 4 |
| 197 | 1812894 | ≥ 2 | ≥ 4 | ≥ 4 |
| 198 | 1813076 | ≥ 2 | ≥ 4 | ≥ 4 |
| 199 | 1815884 | ≥ 2 | ≥ 4 | ≥ 4 |
| 200 | 1816127 | ≥ 2 | ≥ 4 | ≥ 4 |
| 201 | 1817365 | ≥ 2 | ≥ 4 | ≥ 4 |
| 202 | 1819146 | ≥ 2 | ≥ 4 | ≥ 4 |
| 203 | 1819758 | ≥ 2 | ≥ 4 | ≥ 4 |
| 204 | 1820477 | ≥ 2 | ≥ 4 | ≥ 4 |
| 205 | 1821991 | ≥ 2 | ≥ 4 | ≥ 4 |
| 206 | 1822057 | ≥ 2 | ≥ 4 | ≤ 2 |
| 207 | 1822430 | ≥ 2 | ≥ 4 | ≥ 4 |
| 208 | 1822599 | ≥ 2 | ≥ 4 | ≥ 4 |
| 209 | 1823146 | ≥ 2 | ≥ 4 | ≥ 4 |
| 210 | 1824014 | ≥ 2 | ≥ 4 | ≥ 4 |
| 211 | 1824858 | ≥ 2 | ≥ 4 | ≥ 4 |
| 212 | 1825262 | ≥ 2 | ≥ 4 | ≥ 4 |
| 213 | 1825889 | ≥ 2 | ≥ 4 | ≥ 4 |
| 214 | 1826017 | ≥ 2 | ≥ 4 | ≥ 4 |

|     |         |     |     |     |
|-----|---------|-----|-----|-----|
| 215 | 1826067 | ≥ 2 | ≥ 4 | ≥ 4 |
| 216 | 1826174 | ≥ 2 | ≥ 4 | ≥ 4 |
| 217 | 1826332 | ≥ 2 | ≥ 4 | ≥ 4 |
| 218 | 1826389 | ≥ 2 | ≥ 4 | ≥ 4 |
| 219 | 1826466 | ≥ 2 | ≥ 4 | ≥ 4 |
| 220 | 1826503 | ≥ 2 | ≥ 4 | ≥ 4 |
| 221 | 1826507 | ≥ 2 | ≥ 4 | ≥ 4 |
| 222 | 1826858 | ≥ 2 | ≥ 4 | ≥ 4 |
| 223 | 1827255 | ≥ 2 | ≥ 4 | ≥ 4 |
| 224 | 1827473 | ≥ 2 | ≥ 4 | ≥ 4 |
| 225 | 1827500 | ≥ 2 | ≥ 4 | ≥ 4 |
| 226 | 1828232 | ≥ 2 | ≥ 4 | ≥ 4 |
| 227 | 1829427 | ≥ 2 | ≥ 4 | ≥ 4 |
| 228 | 1829496 | ≥ 2 | ≥ 4 | ≥ 4 |
| 229 | 1829525 | ≥ 2 | ≥ 4 | ≥ 4 |
| 230 | 1830110 | ≥ 2 | ≥ 4 | ≥ 4 |
| 231 | 1831141 | ≥ 2 | ≥ 4 | ≥ 4 |
| 232 | 1832787 | ≥ 2 | ≥ 4 | ≥ 4 |
| 233 | 1833087 | ≥ 2 | ≥ 4 | ≥ 4 |
| 234 | 1833255 | ≥ 2 | ≥ 4 | ≥ 4 |
| 235 | 1833931 | ≥ 2 | ≥ 4 | ≥ 4 |
| 236 | 1834695 | ≥ 2 | ≥ 4 | ≥ 4 |
| 237 | 1836111 | ≥ 2 | ≥ 4 | ≥ 4 |
| 238 | 1836927 | ≥ 2 | ≥ 4 | ≥ 4 |
| 239 | 1837981 | ≥ 2 | ≥ 4 | ≥ 4 |
| 240 | 1839209 | ≥ 2 | ≥ 4 | ≥ 4 |
| 241 | 1843688 | ≥ 2 | ≥ 4 | ≥ 4 |
| 242 | 1844885 | ≥ 2 | ≥ 4 | ≥ 4 |
| 243 | 1848366 | ≥ 2 | ≥ 4 | ≥ 4 |
| 244 | 1848507 | ≥ 2 | ≥ 4 | ≥ 4 |
